# Supplementary material
Source: PubMed Central journal article supplement (PMC6763379)
Supplement: NIHMS1537657-supplement-1.pdf [file NIHMS1537657-supplement-1.pdf]

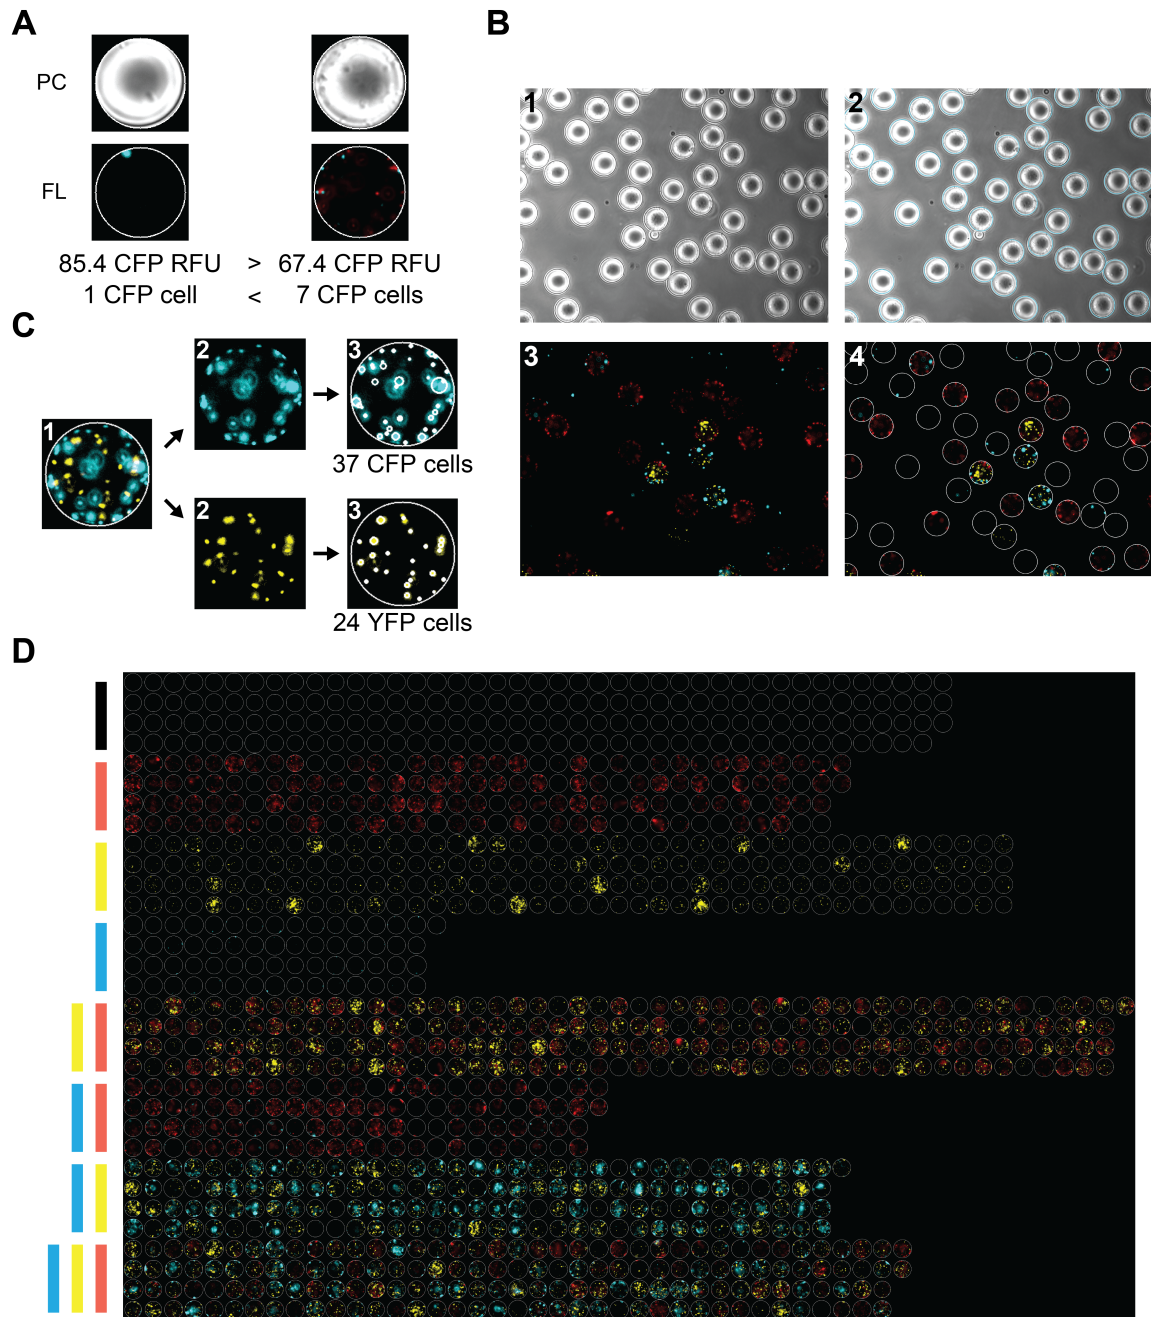

**Figure S1. Computational algorithm for droplet identification and cell counting, Related to Figure 1.** (a) Quantification of strain abundance by automated cell counting or average fluorescence intensity (relative fluorescence units, RFU). A representative droplet containing CFP and RFP labeled cells (left) contained seven times fewer CFP cells (blue), yet exhibited higher average CFP fluorescence intensity than a different representative droplet (right). Phase-contrast (PC) and fluorescence microscopy (FL) are shown. (b) Representative microscopy images showing the droplet segmentation pipeline. First, the raw phase-contrast microscopy image is loaded (1) and droplet positions and size (2, blue circles) are identified via the Hough transformation (OpenCV). The identified droplet locations and raw fluorescence microscopy images (3) are used to segment the droplets (4, white circles). (c) Representative fluorescence microscopy images showing cell counting pipeline. Each segmented droplet image (1) is split into separate images for each fluorescent channel (2). Cells are counted by identifying connected regions of intensity using a blob detection algorithm in OpenCV (3). (d) Representative fluorescence microscopy image showing the final combined droplets for an experiment binned according to the presence and absence of each fluorescently labeled strain.

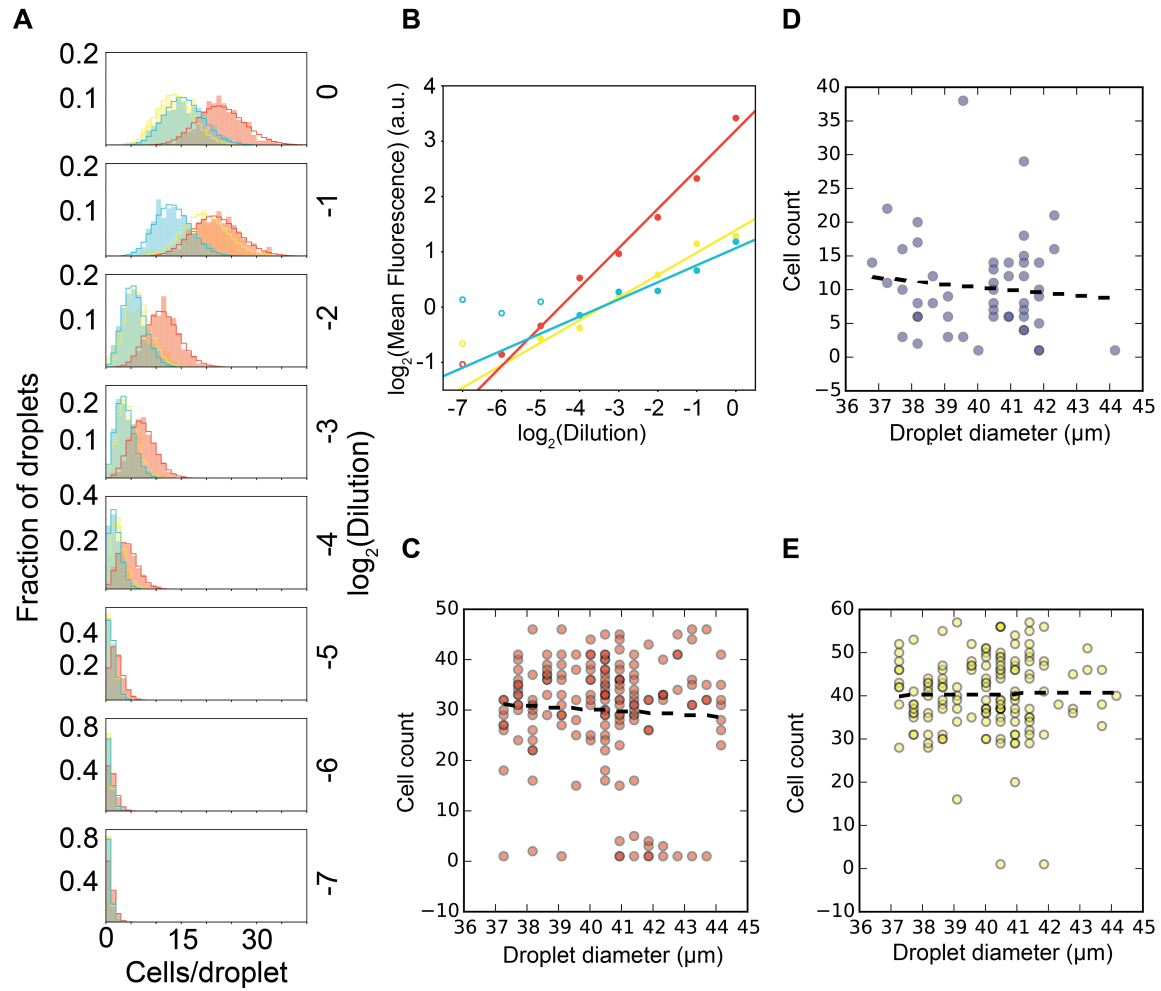

**Figure S2. Characterization of cell counting method in microfluidic droplets, Related to Figure 1.** (a) Histograms of the number of cells in each droplet for a mixed culture of CFP-labeled *E. coli* (blue), RFP-labeled *E. coli* (red) and YFP-labeled *S. typhimurium* (yellow) as described in **Figure 1b-c**. Each subplot represents a different dilution. Solid lines represent the expected Poisson distributions with the mean ( $\lambda$ ) equal to the mean number of counts for the corresponding distribution. (b) Scatter plot of the dilution factor of the mixed culture vs. the log<sub>2</sub> transform of the mean fluorescence from the data described in **Figure S2a** and **Figure 1b,c**. Each data point represents the mean of 400-600 droplets and lines denote linear regression fits to the data excluding the low dilutions that diverge from the linear trend indicated by empty circles. (c) Scatter plot of droplet diameter vs. EC WT cell count (slope=-0.35,  $r = -0.06$ ,  $n=177$ ). Data corresponds to a three-member consortium (EC WT, EC Met- and ST Lac\*, **Table S1**, E6) grown in glucose minimal media supplemented with methionine. (d) Scatter plot of droplet diameter vs. EC Met- cell count (slope=-0.43,  $r = -0.10$ ,  $n=50$ ). (e) Scatter plot of droplet size vs. ST Lac\* cell count (slope=0.12,  $r = -0.02$ ,  $n=148$ ).



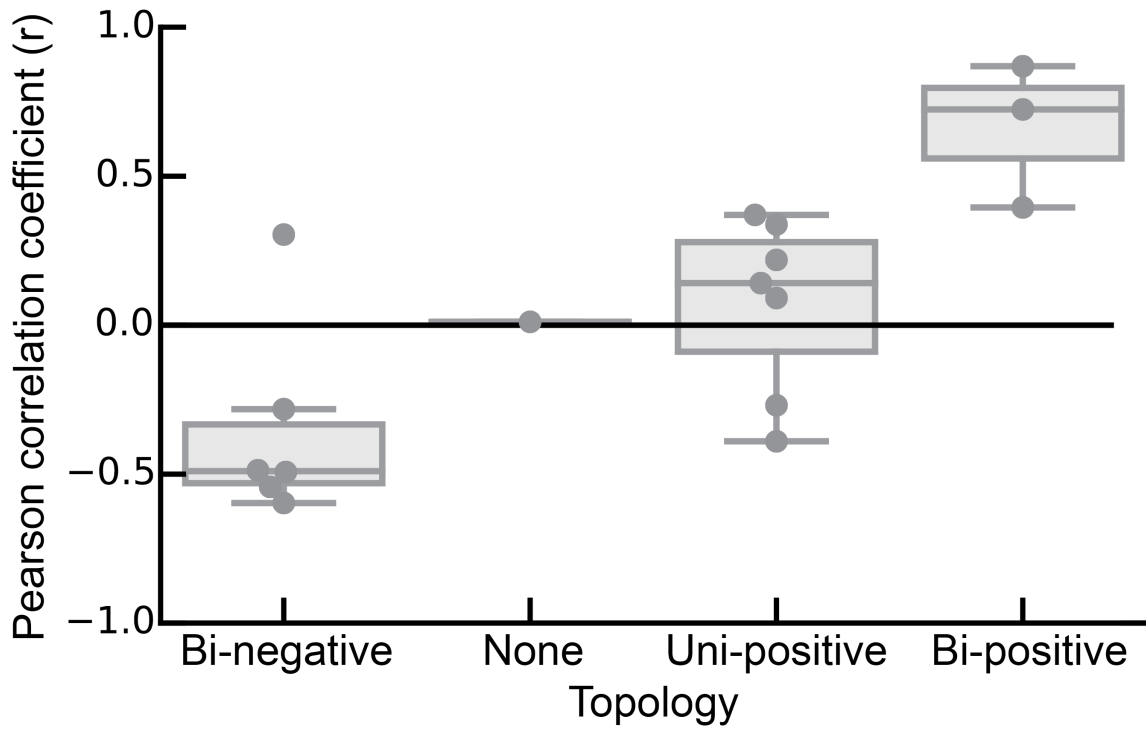

**Figure S4. Pearson correlation coefficient clusters by pairwise network topology, Related to Figures 2 and 3.** Box and whiskers plot of the Pearson Correlation coefficients of cell counts for each pair of strains across all experiments binned by the inferred network topology using MINI-Drop. The center line indicates the median, the bottom and top edges of the box indicate the 25<sup>th</sup> and 75<sup>th</sup> percentiles, respectively. The whiskers extend to the most extreme data points not considered outliers and outliers are plotted individually using the diamond symbol.



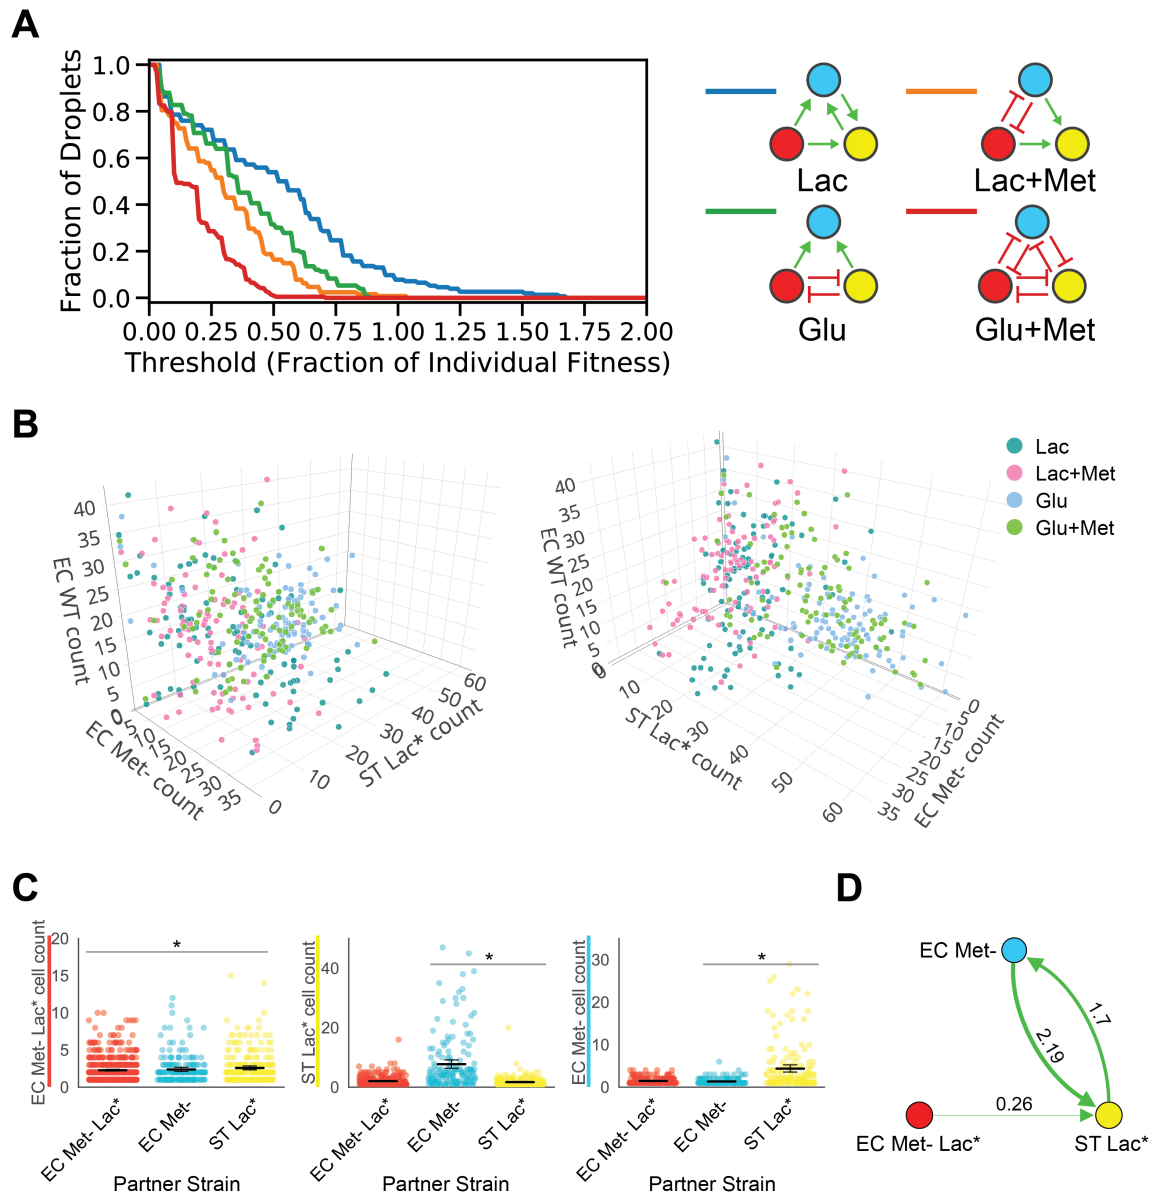

**Figure S5. Quantification of strain coexistence and microbial interactions in a three-member consortium, Related to Figure 3.** (a) Fraction of three-member droplets that exhibit strain coexistence in a three-member consortium (EC Met-, EC WT, ST Lac\*, **Table S1**, E3-6) following 18 hr incubation at 37°C. For a droplet to be counted as a co-existence droplet, all three strains must have a number of cells greater than the threshold fraction multiplied by their respective mean cell count in single strain droplets. Lines of different colors represent the community grown in different media conditions. (b) Three-dimensional scatter plot of cell counts in a three-member consortium (**Table S1**, E3-6) from two perspectives. Only droplets that contained all three strains are shown. (c) Categorical scatter plot showing cell count distributions of EC Met- Lac\* (top), ST Lac\* (middle) and EC Met- (bottom) in lactose minimal media (**Table S1**, E7) The black horizontal line represents the mean and the error bars denote the bootstrapped 95% confidence intervals for the mean. The gray horizontal bars indicate a statistically significant difference ( $p < 0.05$ , **Table S2**). (d) Schematic of the inferred interaction network. The edge width is proportional to the  $\log_2$  ratio of the average cell count in the presence of a partner compared to the cell count in the absence of the partner. Node size is proportional to the average cell count of each strain grown in isolation.

**A**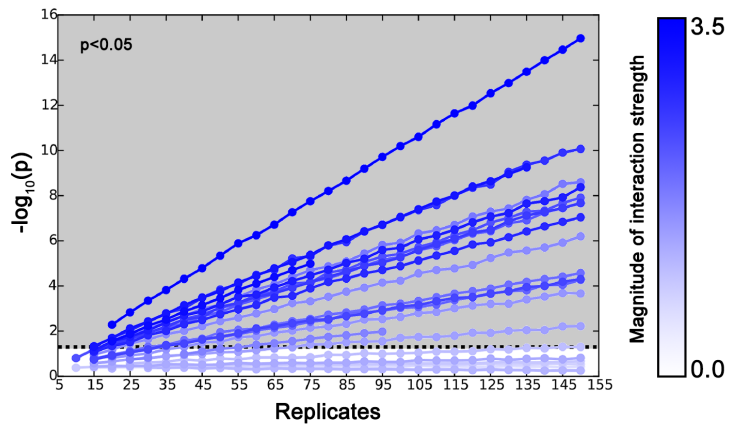**B**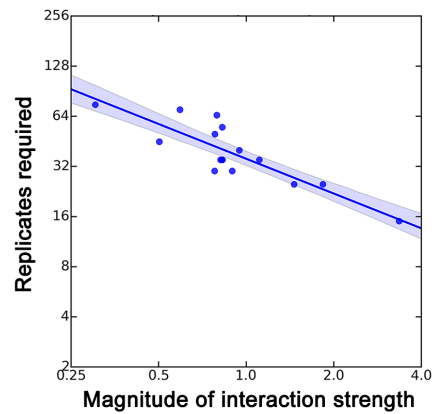

**Figure S6. Number of droplets (replicates) required to infer microbial interactions of varying strengths using MINI-Drop, Related to Figures 2 and 3.** (a) Scatter plot of the number of droplets (replicates) vs. the statistical significance of the interaction ( $-\log_{10}(p)$ ) based on the Mann-Whitney U test in experiments E1-7 (Table S1). Each data point represents an average p-value computed by sub-sampling the data 500 times across a range of depths. The dashed line represents a p-value equal to 0.05 (statistical significance threshold). The gray box represents the parameter regime for statistical significance ( $p < 0.05$ ). The shade of blue represents the magnitude of the inferred interaction using MINI-Drop. (b) The number of droplet replicates required for the p-value to be equal to or less than 0.05.

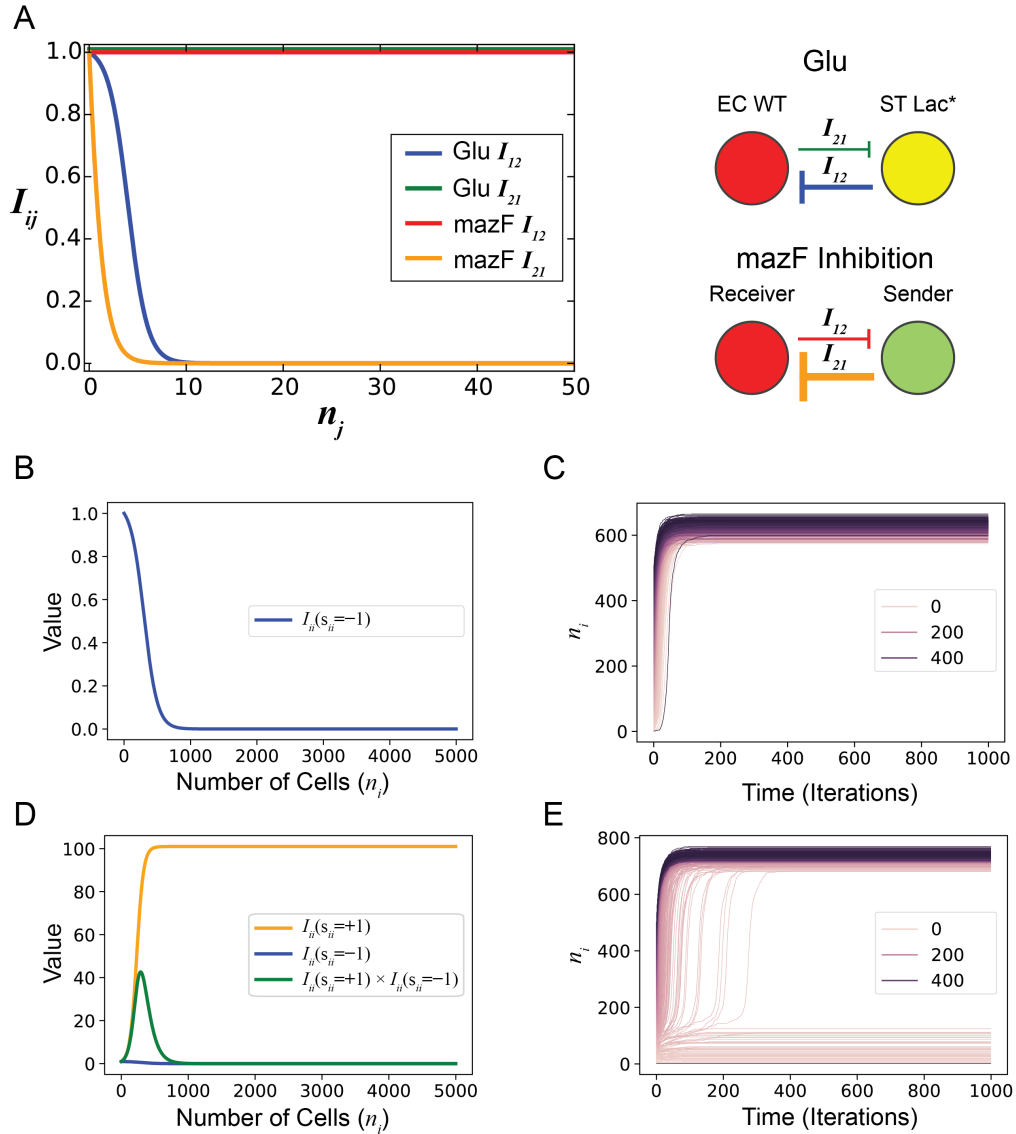

**Figure S7. Model analysis of interaction strengths in bidirectional negative interaction networks and modified stochastic model that displays an Allee effect, Related to Figure 5.** (a) Inferred interaction network topologies of pairwise consortia in experiments E2 and E5 (Table S1) were modeled using the discrete-time Markov growth model. The inter-strain interactions in the model are represented as  $I_{ij}$  (see STAR Methods). The toxin mediated negative interaction (orange, right) exhibited a higher sensitivity to partner cell number in the model compared to the outgoing negative interaction from ST Lac\* to EC WT (blue, right). (b) The self-inhibition curve (blue) as a function of self-cell count ( $n_i$ ) for a stochastic logistic growth model. (c) Simulated cell counts as a function of time for a stochastic logistic growth model from a range of initial populations sizes represented by the line color (1-500 cells,  $n_{i,t=0}$ ). (d) The positive self-interaction curve (yellow), self-inhibition curve (blue), and overall growth modifier (green) as a function of self-cell count ( $n_i$ ) for a modified stochastic growth model designed to display positive density-dependent growth referred to as the Allee effect. (e) The simulated cell counts as a function of time for a modified stochastic model that exhibits an Allee effect ( $n_{i,t=0}$ ). The color of the lines represents the initial population size.

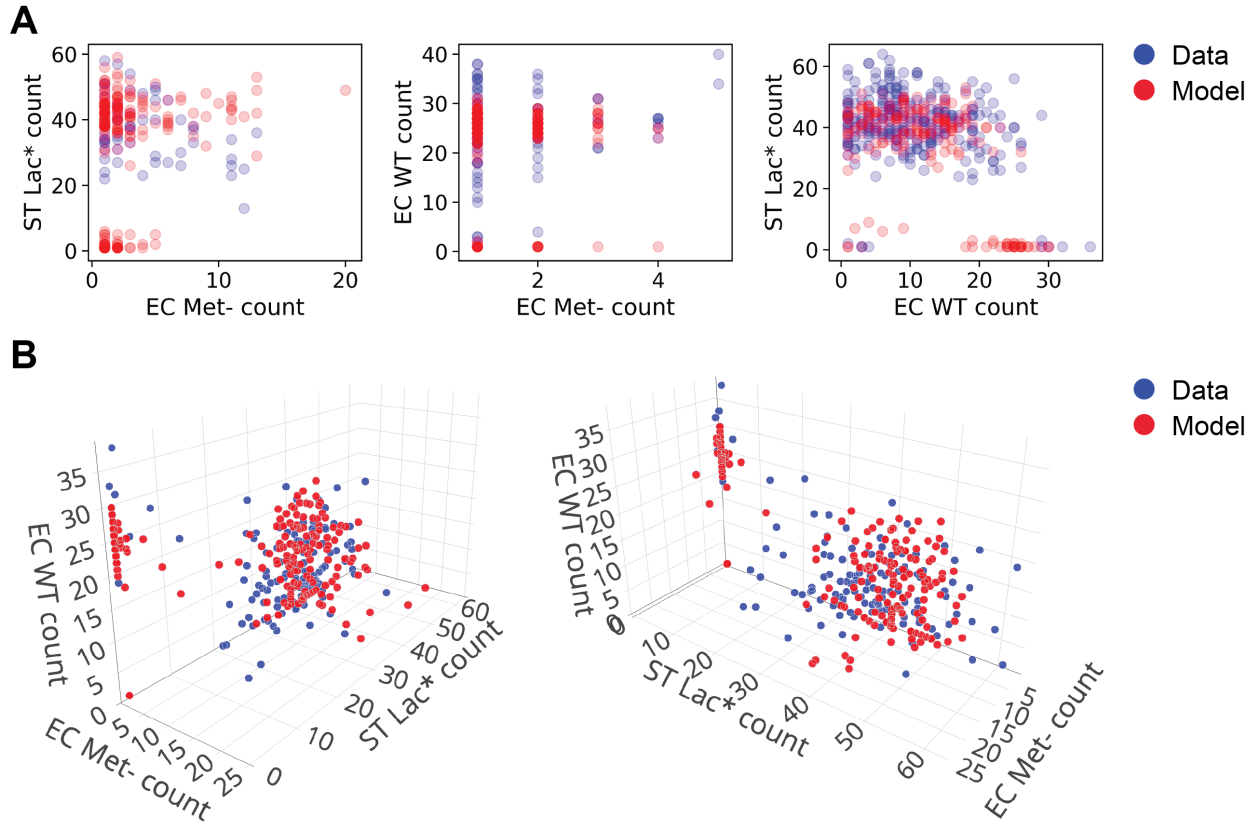

**Figure S8. Parameterized model can recapitulate cell count distributions in two and three-member droplets, Related to Figures 3 and 5. (a)** Scatter plots of cell counts in two-member droplets in a parameterized model (red) and experimental data (blue). The community was grown in a media containing glucose (**Table S1**, E5). **(b)** Three-dimensional scatter plots of cell counts in three-member droplets in a parameterized model (red) and experimental data (blue) using the same parameter set as in (a) (**Table S4**).

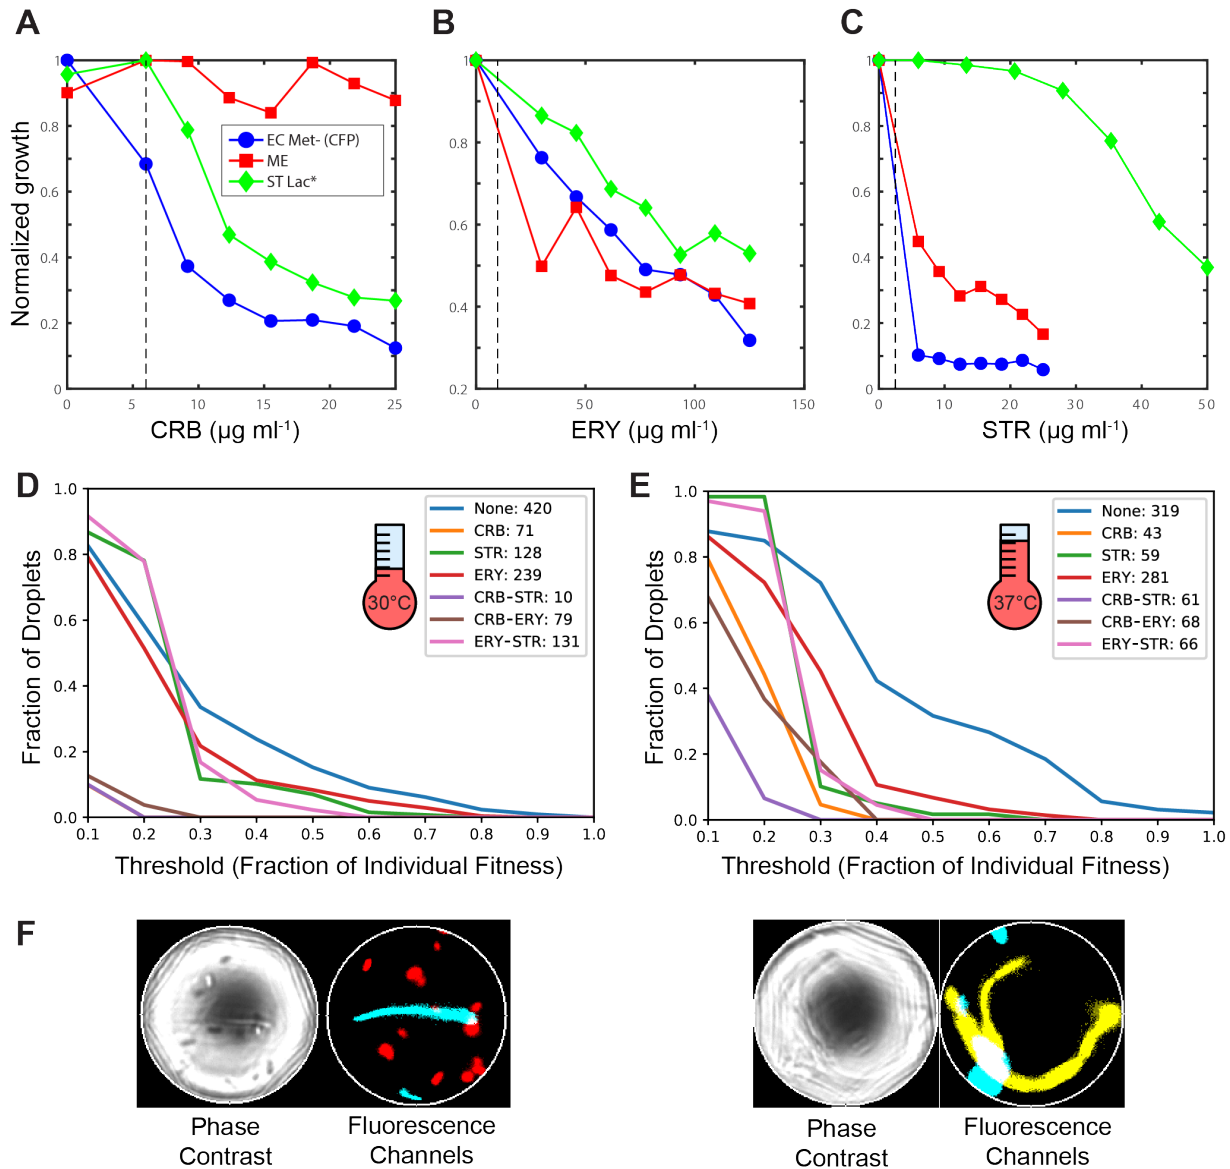

**Figure S9. Antibiotic susceptibilities and coexistence of EC Met- (CFP), ME, and ST Lac\*, Related to Figure 6.** Normalized growth of each species over a range of (a) carbenicillin (CRB), (b) erythromycin (ERY), and (c) streptomycin (STR) concentrations ( $\mu\text{g mL}^{-1}$ ) in microtiter plates. Normalized growth was computed as the integral of the growth response based on OD600 values of each condition over 24 hours divided by the maximum growth of each strain across all concentrations of a given antibiotic. The dashed line denotes the concentration of antibiotic that was used in the droplet experiments (Table S1, E8-21). Fraction of three-species droplets (Table S1, E8-21) where all three species co-exist a function of a threshold at 30°C (d) or 37°C (e). For a droplet to be counted as a co-existence droplet, all three strains must have a number of cells greater than the threshold fraction multiplied by their mean cell count in single strain droplets in the absence of antibiotics (Tables S6 and S7). Numbers in the legend indicate the number of three-species droplets observed in each condition. Note that in (d) the CRB curve (orange) is obscured by the CRB-STR curve (purple). (f) Representative images of CRB droplets with elongated EC Met- (cyan, left) or ST Lac\* (yellow, right) cells.

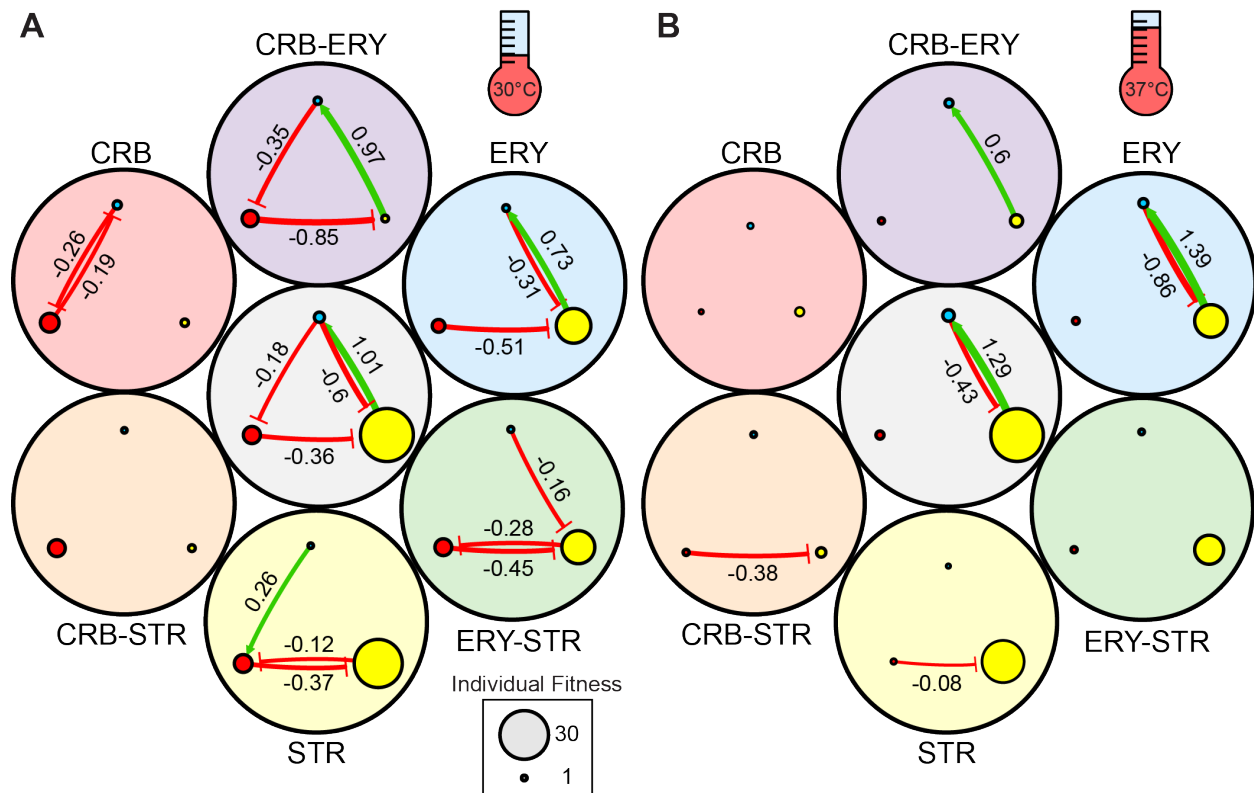

**Figure S10. Pairwise microbial interaction networks in each antibiotic condition at different temperatures, Related to Figure 6.** Inferred interaction networks in the presence of the specified combination of streptomycin (STR), carbenicillin (CRB), and erythromycin (ERY) at 30°C (a) or 37°C (b). The gray circle in center indicates the no antibiotic case. The edge width is proportional to the log<sub>2</sub> ratio of the average cell count in the presence of a partner to the average cell count in the absence of the partner. Node size is proportional to the average cell count of each strain grown in isolation. Red nodes represent ME, yellow nodes represent ST Lac\*, and blue nodes represent EC Met-. Only those interactions with p < 0.05 according to a two-sided Mann-Whitney U test are shown (Table S11).



**Table S1. Strains and Media Conditions for Each Experiment, Related to Figures 2-4 and 6**

| Number | Strains                                        | Condition                                 | Figure         |
|--------|------------------------------------------------|-------------------------------------------|----------------|
| E1     | BS Trp-<br>EC Met- (RFP)                       | M9 Glucose                                | 2a-d           |
| E2     | EC Sender<br>EC Receiver                       | LB                                        | 2e-h           |
| E3     | EC Met- (CFP)<br>ST Lac*<br>EC WT              | M9 Lactose                                | 3a,e,i<br>4d,e |
| E4     | EC Met- (CFP)<br>ST Lac*<br>EC WT              | M9 Lactose + Met                          | 3b,f,j         |
| E5     | EC Met- (CFP)<br>ST Lac*<br>EC WT              | M9 Glucose                                | 3c,g,k         |
| E6     | EC Met- (CFP)<br>ST Lac*<br>EC WT              | M9 Glucose + Met                          | 3d,h,l         |
| E7     | EC Met- (CFP)<br>ST Lac*<br>EC Met- Lac* (RFP) | M9 Lactose                                | 4b,c           |
| E8     | EC Met- (CFP)<br>ST Lac*<br>ME                 | Modified Hypho Media, 30°C                | 6b             |
| E9     | EC Met- (CFP)<br>ST Lac*<br>ME                 | Modified Hypho Media + STR,<br>30°C       | 6b             |
| E10    | EC Met- (CFP)<br>ST Lac*<br>ME                 | Modified Hypho Media + CRB,<br>30°C       | 6b             |
| E11    | EC Met- (CFP)<br>ST Lac*<br>ME                 | Modified Hypho Media + ERY,<br>30°C       | 6b             |
| E12    | EC Met- (CFP)<br>ST Lac*<br>ME                 | Modified Hypho Media + STR +<br>CRB, 30°C | 6b             |
| E13    | EC Met- (CFP)<br>ST Lac*<br>ME                 | Modified Hypho Media + STR +<br>ERY, 30°C | 6b             |
| E14    | EC Met- (CFP)<br>ST Lac*<br>ME                 | Modified Hypho Media + CRB +<br>ERY, 30°C | 6b             |
| E15    | EC Met- (CFP)<br>ST Lac*<br>ME                 | Modified Hypho Media, 37°C                | 6c             |
| E16    | EC Met- (CFP)<br>ST Lac*<br>ME                 | Modified Hypho Media + STR,<br>37°C       | 6c             |
| E17    | EC Met- (CFP)<br>ST Lac*<br>ME                 | Modified Hypho Media + CRB,<br>37°C       | 6c             |
| E18    | EC Met- (CFP)<br>ST Lac*<br>ME                 | Modified Hypho Media + ERY,<br>37°C       | 6c             |
| E19    | EC Met- (CFP)<br>ST Lac*<br>ME                 | Modified Hypho Media + STR +<br>CRB, 37°C | 6c             |
| E20    | EC Met- (CFP)<br>ST Lac*<br>ME                 | Modified Hypho Media + STR +<br>ERY, 37°C | 6c             |
| E21    | EC Met- (CFP)<br>ST Lac*<br>ME                 | Modified Hypho Media + CRB +<br>ERY, 37°C | 6c             |

**Table S2. Interaction Magnitudes and Statistics for Experiments 1-7, Related to Figures 2 and 3**

| Experiment               | Strain (Sink Node) | Grown With (Source Node) | p-value     | <0.05 | Mean Count Alone | Mean Count With Partner | Fold Change | Fold Change LCI | Fold Change UCI | Interaction Strength | Interaction Strength LCI | Interaction Strength UCI | Number of Droplets |
|--------------------------|--------------------|--------------------------|-------------|-------|------------------|-------------------------|-------------|-----------------|-----------------|----------------------|--------------------------|--------------------------|--------------------|
| Glucose                  | EC Met-            | EC WT                    | 0.010489677 | TRUE  | 1.15             | 1.73                    | 1.51        | 1.19            | 1.87            | 0.59                 | 0.25                     | 0.9                      | 95                 |
| Glucose                  | EC Met-            | ST Lac*                  | 6.84E-06    | TRUE  | 1.15             | 4.1                     | 3.57        | 2.65            | 4.68            | 1.84                 | 1.41                     | 2.23                     | 78                 |
| Glucose                  | EC WT              | EC Met-                  | 0.798942338 | FALSE | 22.48            | 24.13                   | 1.07        | 0.95            | 1.2             | 0.1                  | -0.07                    | 0.27                     | 265                |
| Glucose                  | EC WT              | ST Lac*                  | 1.01E-23    | TRUE  | 22.48            | 10.42                   | 0.46        | 0.41            | 0.52            | -1.11                | -1.27                    | -0.95                    | 447                |
| Glucose                  | ST Lac*            | EC Met-                  | 0.019029857 | TRUE  | 39.37            | 37.09                   | 0.94        | 0.87            | 1.02            | -0.09                | -0.2                     | 0.02                     | 227                |
| Glucose                  | ST Lac*            | EC WT                    | 0.088821192 | FALSE | 39.37            | 40.99                   | 1.04        | 0.99            | 1.1             | 0.06                 | -0.01                    | 0.13                     | 426                |
| Glucose +Methionine      | EC Met-            | EC WT                    | 2.58E-05    | TRUE  | 10.34            | 6.02                    | 0.58        | 0.44            | 0.77            | -0.78                | -1.17                    | -0.38                    | 151                |
| Glucose +Methionine      | EC Met-            | ST Lac*                  | 2.96E-10    | TRUE  | 10.34            | 3.75                    | 0.36        | 0.28            | 0.48            | -1.46                | -1.86                    | -1.06                    | 139                |
| Glucose +Methionine      | EC WT              | EC Met-                  | 2.12E-11    | TRUE  | 29.98            | 21.16                   | 0.71        | 0.62            | 0.79            | -0.5                 | -0.68                    | -0.34                    | 278                |
| Glucose +Methionine      | EC WT              | ST Lac*                  | 3.94E-37    | TRUE  | 29.98            | 16.11                   | 0.54        | 0.5             | 0.58            | -0.9                 | -1.01                    | -0.78                    | 574                |
| Glucose +Methionine      | ST Lac*            | EC Met-                  | 0.000676812 | TRUE  | 40.37            | 35.51                   | 0.88        | 0.81            | 0.95            | -0.19                | -0.3                     | -0.08                    | 237                |
| Glucose +Methionine      | ST Lac*            | EC WT                    | 2.01E-12    | TRUE  | 40.37            | 32.73                   | 0.81        | 0.77            | 0.85            | -0.3                 | -0.38                    | -0.23                    | 545                |
| Lactose                  | EC Met-            | EC WT                    | 3.82E-05    | TRUE  | 1.61             | 2.85                    | 1.77        | 1.44            | 2.19            | 0.83                 | 0.52                     | 1.13                     | 155                |
| Lactose                  | EC Met-            | ST Lac*                  | 1.29E-20    | TRUE  | 1.61             | 16.48                   | 10.25       | 8.5             | 12.32           | 3.36                 | 3.09                     | 3.62                     | 202                |
| Lactose                  | EC WT              | EC Met-                  | 0.089775303 | FALSE | 23.33            | 21.37                   | 0.92        | 0.79            | 1.06            | -0.13                | -0.34                    | 0.08                     | 236                |
| Lactose                  | EC WT              | ST Lac*                  | 0.171934431 | FALSE | 23.33            | 22.63                   | 0.97        | 0.87            | 1.1             | -0.04                | -0.21                    | 0.13                     | 339                |
| Lactose                  | ST Lac*            | EC Met-                  | 3.93E-18    | TRUE  | 11.55            | 19.82                   | 1.72        | 1.47            | 2.01            | 0.78                 | 0.56                     | 1.01                     | 317                |
| Lactose                  | ST Lac*            | EC WT                    | 8.04E-19    | TRUE  | 11.55            | 20.51                   | 1.78        | 1.53            | 2.07            | 0.83                 | 0.61                     | 1.05                     | 373                |
| Lactose +Methionine      | EC Met-            | EC WT                    | 4.89E-07    | TRUE  | 20.38            | 11.76                   | 0.58        | 0.48            | 0.69            | -0.79                | -1.06                    | -0.54                    | 239                |
| Lactose +Methionine      | EC Met-            | ST Lac*                  | 0.810598122 | FALSE | 20.38            | 20.17                   | 0.99        | 0.86            | 1.15            | -0.01                | -0.22                    | 0.2                      | 246                |
| Lactose +Methionine      | EC WT              | EC Met-                  | 8.47E-14    | TRUE  | 26.09            | 14.81                   | 0.57        | 0.48            | 0.66            | -0.82                | -1.05                    | -0.61                    | 267                |
| Lactose +Methionine      | EC WT              | ST Lac*                  | 0.332001813 | FALSE | 26.09            | 25.48                   | 0.98        | 0.89            | 1.08            | -0.03                | -0.17                    | 0.11                     | 307                |
| Lactose +Methionine      | ST Lac*            | EC Met-                  | 1.13E-13    | TRUE  | 8.6              | 16.58                   | 1.93        | 1.61            | 2.3             | 0.95                 | 0.69                     | 1.2                      | 290                |
| Lactose +Methionine      | ST Lac*            | EC WT                    | 6.55E-17    | TRUE  | 8.6              | 15.25                   | 1.77        | 1.5             | 2.1             | 0.83                 | 0.58                     | 1.07                     | 323                |
| Higher Order Interaction | EC Met-            | EC Met-Lac*              | 0.086973747 | FALSE | 1.34             | 1.47                    | 1.09        | 0.98            | 1.22            | 0.13                 | -0.03                    | 0.29                     | 350                |
| Higher Order Interaction | EC Met-            | ST Lac*                  | 1.37E-14    | TRUE  | 1.34             | 4.38                    | 3.26        | 2.61            | 4.03            | 1.7                  | 1.38                     | 2.01                     | 317                |
| Higher Order Interaction | EC Met-Lac*        | EC Met-                  | 0.882671829 | FALSE | 2.28             | 2.37                    | 1.04        | 0.92            | 1.18            | 0.06                 | -0.13                    | 0.24                     | 765                |
| Higher Order Interaction | EC Met-Lac*        | ST Lac*                  | 0.122587282 | FALSE | 2.28             | 2.58                    | 1.13        | 1.01            | 1.27            | 0.18                 | 0.02                     | 0.35                     | 839                |
| Higher Order Interaction | ST Lac*            | EC Met-                  | 2.70E-29    | TRUE  | 1.69             | 7.71                    | 4.56        | 3.63            | 5.67            | 2.19                 | 1.86                     | 2.5                      | 378                |
| Higher Order Interaction | ST Lac*            | EC Met-Lac*              | 0.004930119 | TRUE  | 1.69             | 2.03                    | 1.2         | 1.01            | 1.41            | 0.26                 | 0.02                     | 0.49                     | 485                |
| Mutualism                | BS Trp-            | EC Met-                  | 1.49E-06    | TRUE  | 1.61             | 6.78                    | 4.2         | 3.06            | 5.69            | 2.07                 | 1.61                     | 2.51                     | 187                |
| Mutualism                | EC Met-            | BS Trp-                  | 3.81E-26    | TRUE  | 2.38             | 7.81                    | 3.27        | 2.8             | 3.78            | 1.71                 | 1.49                     | 1.92                     | 372                |
| mazF Inhibition          | Sender             | Reciever                 | 0.000223434 | TRUE  | 54.24            | 43.59                   | 0.8         | 0.71            | 0.9             | -0.32                | -0.49                    | -0.16                    | 1512               |
| mazF Inhibition          | Reciever           | Sender                   | 3.75E-14    | TRUE  | 3.25             | 1.24                    | 0.38        | 0.33            | 0.44            | -1.4                 | -1.61                    | -1.18                    | 421                |

**Table S3. Higher-Order Interaction Calculations for Experiments 1-7, Related to Figure 4**

| Experiment | Grown With   | Strain       | Sign | Int Strength | p-value     | HOI Detected |
|------------|--------------|--------------|------|--------------|-------------|--------------|
| Glu        | EC Met-      | EC WT        | 0    | 0.102114968  | 0.798942338 | 0            |
| Glu        | ST Lac*      | EC WT        | -    | -1.109524627 | 1.01E-23    | 0            |
| Glu        | 3m           | EC WT        | -    | -1.148448126 | 2.38E-17    | 0            |
| Glu        | EC WT        | EC Met-      | +    | 0.591915261  | 0.010489677 | 0            |
| Glu        | ST Lac*      | EC Met-      | +    | 1.835202907  | 6.84E-06    | 0            |
| Glu        | 3m           | EC Met-      | +    | 1.798366139  | 1.30E-05    | 0            |
| Glu        | EC Met-      | ST Lac*      | -    | -0.086099068 | 0.019029857 | 0            |
| Glu        | EC WT        | ST Lac*      | 0    | 0.058231313  | 0.088821192 | 0            |
| Glu        | 3m           | ST Lac*      | -    | -0.117580117 | 0.004504493 | 0            |
| Glu+Met    | EC Met-      | EC WT        | -    | -0.5026437   | 2.12E-11    | 0            |
| Glu+Met    | ST Lac*      | EC WT        | -    | -0.895618839 | 3.94E-37    | 0            |
| Glu+Met    | 3m           | EC WT        | -    | -1.193141705 | 2.83E-36    | 0            |
| Glu+Met    | EC WT        | EC Met-      | -    | -0.78044825  | 2.58E-05    | 0            |
| Glu+Met    | ST Lac*      | EC Met-      | -    | -1.462193419 | 2.96E-10    | 0            |
| Glu+Met    | 3m           | EC Met-      | -    | -1.438228555 | 1.40E-12    | 0            |
| Glu+Met    | EC Met-      | ST Lac*      | -    | -0.18529422  | 0.000676812 | 0            |
| Glu+Met    | EC WT        | ST Lac*      | -    | -0.302928912 | 2.01E-12    | 0            |
| Glu+Met    | 3m           | ST Lac*      | -    | -0.476371913 | 8.67E-17    | 0            |
| Lac        | EC Met-      | EC WT        | 0    | -0.126502372 | 0.089775303 | 0            |
| Lac        | ST Lac*      | EC WT        | 0    | -0.043722704 | 0.171934431 | 0            |
| Lac        | 3m           | EC WT        | -    | -0.665029763 | 2.87E-10    | 1            |
| Lac        | EC WT        | EC Met-      | +    | 0.827527832  | 3.82E-05    | 0            |
| Lac        | ST Lac*      | EC Met-      | +    | 3.35824958   | 1.29E-20    | 0            |
| Lac        | 3m           | EC Met-      | +    | 2.855790575  | 2.25E-18    | 0            |
| Lac        | EC Met-      | ST Lac*      | +    | 0.778602072  | 3.93E-18    | 0            |
| Lac        | EC WT        | ST Lac*      | +    | 0.828481936  | 8.04E-19    | 0            |
| Lac        | 3m           | ST Lac*      | +    | 0.645157283  | 4.63E-12    | 0            |
| Lac+Met    | EC Met-      | EC WT        | -    | -0.816832143 | 8.47E-14    | 0            |
| Lac+Met    | ST Lac*      | EC WT        | 0    | -0.033922516 | 0.332001813 | 0            |
| Lac+Met    | 3m           | EC WT        | -    | -0.738184601 | 3.03E-15    | 0            |
| Lac+Met    | EC WT        | EC Met-      | -    | -0.793309929 | 4.89E-07    | 0            |
| Lac+Met    | ST Lac*      | EC Met-      | 0    | -0.014625345 | 0.810598122 | 0            |
| Lac+Met    | 3m           | EC Met-      | -    | -0.768469587 | 2.01E-07    | 0            |
| Lac+Met    | EC Met-      | ST Lac*      | +    | 0.947643409  | 1.13E-13    | 0            |
| Lac+Met    | EC WT        | ST Lac*      | +    | 0.826752374  | 6.55E-17    | 0            |
| Lac+Met    | 3m           | ST Lac*      | +    | 0.554962381  | 4.19E-09    | 0            |
| hoi        | EC Met-      | EC Met- Lac* | 0    | 0.057889933  | 0.882671829 | 0            |
| hoi        | ST Lac*      | EC Met- Lac* | 0    | 0.180899803  | 0.122587282 | 0            |
| hoi        | 3m           | EC Met- Lac* | +    | 0.502234034  | 0.001246654 | 1            |
| hoi        | EC Met- Lac* | EC Met-      | 0    | 0.130811642  | 0.086973747 | 0            |
| hoi        | ST Lac*      | EC Met-      | +    | 1.704864099  | 1.37E-14    | 0            |
| hoi        | 3m           | EC Met-      | +    | 0.974726786  | 2.54E-07    | 0            |
| hoi        | EC Met-      | ST Lac*      | +    | 2.187905903  | 2.70E-29    | 0            |
| hoi        | EC Met- Lac* | ST Lac*      | +    | 0.264819775  | 0.004930119 | 0            |
| hoi        | 3m           | ST Lac*      | +    | 1.384703855  | 8.20E-15    | 0            |

**Table S4. Stochastic Model Parameters, Related to STAR Methods and Figure 5**

| Parameters for Figure 5C           |             | Parameters for Figure 5D           |             | Parameters for Figure S8 |             |
|------------------------------------|-------------|------------------------------------|-------------|--------------------------|-------------|
| strain_1                           | EC WT       | strain_1                           | EC Met-     | strain_1                 | EC Met-     |
| strain_2                           | ST Lac*     | strain_2                           | ST Lac*     | strain_2                 | ST Lac*     |
| r_div_1                            | 0.542       | r_div_1                            | 0.057       | strain_3                 | EC WT       |
| r_death_1                          | 0.05        | r_death_1                          | 0.01        | r_div_1                  | 0.0004      |
| r_div_2                            | 0.215       | r_div_2                            | 0.029       | r_death_1                | 0.05        |
| r_death_2                          | 0.05        | r_death_2                          | 0.006       | r_div_2                  | 0.21515     |
| s_11                               | -1          | s_11                               | -1          | r_death_2                | 0.05        |
| s_22                               | -1          | s_22                               | -1          | r_div_3                  | 0.54205     |
| s_12                               | -1          | s_12                               | -1          | r_death_3                | 0.05        |
| s_21                               | -1          | s_21                               | 1           | s_11                     | -1          |
| k_11                               | 0.2         | k_11                               | 0.05        | s_22                     | -1          |
| a_11                               | 0.449328964 | a_11                               | 9.487735836 | s_33                     | -1          |
| k_22                               | 0.06        | k_22                               | 0.05        | s_12                     | 0           |
| a_22                               | 2.718281828 | a_22                               | 9.487735836 | s_13                     | 0           |
| k_12                               | 1           | k_12                               | 0           | s_21                     | 1           |
| a_12                               | 0.018315639 | a_12                               | 0           | s_23                     | -1          |
| k_21                               | 0.05        | k_21                               | 1           | s_31                     | 1           |
| a_21                               | 2.06E-09    | a_21                               | 1           | s_32                     | -1          |
| <b>Parameters for Figure 5E</b>    |             | <b>Parameters for Fig. 5F</b>      |             | k_11                     | 0.05        |
| strain_1                           | EC Met-     | strain_1                           | Sender      | a_11                     | 5.754602676 |
| strain_2                           | ST Lac*     | strain_2                           | Receiver    | k_22                     | 0.06        |
| r_div_1                            | 0.004       | r_div_1                            | 0.06        | a_22                     | 6           |
| r_death_1                          | 0.015       | r_death_1                          | 0.015       | k_33                     | 0.2         |
| r_div_2                            | 0.011       | r_div_2                            | 0.015       | a_33                     | 4.49E-01    |
| r_death_2                          | 0.015       | r_death_2                          | 0.01        | k_21                     | 2           |
| s_11                               | -1          | s_11                               | -1          | a_21                     | 0.0098      |
| s_22                               | -1          | s_22                               | -1          | k_23                     | 1           |
| s_12                               | 1           | s_12                               | -1          | a_23                     | 0.0183      |
| s_21                               | 1           | s_21                               | -1          | k_31                     | 1           |
| k_11                               | 0.05        | k_11                               | 0.02        | a_31                     | 2.1         |
| a_11                               | 5.754602676 | a_11                               | 9.025013499 | k_32                     | 0.05        |
| k_22                               | 0.05        | k_22                               | 0.05        | a_32                     | 0           |
| a_22                               | 5.754602676 | a_22                               | 9.487735836 |                          |             |
| k_12                               | 1           | k_12                               | 0.05        |                          |             |
| a_12                               | 0.049787068 | a_12                               | 3.06E-07    |                          |             |
| k_21                               | 1           | k_21                               | 1           |                          |             |
| a_21                               | 0.135335283 | a_21                               | 2.718281828 |                          |             |
| <b>Parameters for Figure S7B,C</b> |             | <b>Parameters for Figure S7D,E</b> |             |                          |             |
| r_div_1                            | 0.005       | r_div_1                            | 0.005       |                          |             |
| r_death_1                          | 0.05        | r_death_1                          | 0.05        |                          |             |
| s_11_-                             | -1          | s_11_-                             | -1          |                          |             |
| k_11_-                             | 0.01        | s_11_+                             | 1           |                          |             |
| a_11_-                             | 0.05        | k_11_-                             | 0.01        |                          |             |
|                                    |             | a_11_-                             | 0.05        |                          |             |
|                                    |             | k_11_+                             | 0.02        |                          |             |
|                                    |             | k_11_+                             | 0.01        |                          |             |

**Table S5. Modified Hypho Media Composition, Related to STAR Methods**

| <b>Chemical</b>                                                                   | <b>Concentration</b> |
|-----------------------------------------------------------------------------------|----------------------|
| ZnCl <sub>2</sub>                                                                 | 1.2 μM               |
| MnCl <sub>2</sub> 4H <sub>2</sub> O                                               | 1 μM                 |
| FeCl <sub>2</sub>                                                                 | 18 μM                |
| (NH <sub>4</sub> ) <sub>6</sub> Mo <sub>7</sub> O <sub>24</sub> 4H <sub>2</sub> O | 2 μM                 |
| CuSO <sub>4</sub>                                                                 | 1 μM                 |
| CoCl <sub>2</sub> 6H <sub>2</sub> O                                               | 2 μM                 |
| Na <sub>2</sub> WO <sub>4</sub> 2H <sub>2</sub> O                                 | 0.33 μM              |
| K <sub>2</sub> HPO <sub>4</sub>                                                   | 14.5 mM              |
| NaH <sub>2</sub> PO <sub>4</sub> 2H <sub>2</sub> O                                | 16.3 mM              |
| Na <sub>2</sub> SO <sub>4</sub>                                                   | 3.78 mM              |
| MgSO <sub>4</sub>                                                                 | 814 μM               |
| C <sub>12</sub> H <sub>22</sub> O <sub>11</sub> (Lactose)                         | 2.78 mM              |
| CH <sub>5</sub> N (Methylamine)                                                   | 231 μM               |
| C <sub>5</sub> H <sub>11</sub> NO <sub>2</sub> S (Methionine)                     | 20 μM                |
| C <sub>2</sub> H <sub>3</sub> NaO <sub>2</sub> (Sodium acetate)                   | 750 μM               |
| NH <sub>4</sub> Cl (Ammonium chloride)                                            | 7.56 mM              |
| C <sub>6</sub> H <sub>12</sub> O <sub>6</sub> (Glucose)                           | 5.55 mM              |
| (CH <sub>2</sub> ) <sub>2</sub> (CO <sub>2</sub> H) <sub>2</sub> (Succinate)      | 3.7 mM               |

**Table S6. Types of Interactions in the Antibiotic Interaction Networks, Related to Figure 6**

| Interaction Type | Description                                                                                               | Abbreviation                  | Numerator                                          | Denominator                                        | Comparing Different Populations of Droplets? | Network Arrow Sign Modifier |
|------------------|-----------------------------------------------------------------------------------------------------------|-------------------------------|----------------------------------------------------|----------------------------------------------------|----------------------------------------------|-----------------------------|
| 1                | Impact of partner on grower                                                                               | species-species               | Cell Count in Two-Species, No Antibiotic Droplets  | Cell Count in One-Species, No Antibiotic Droplets  | No                                           | 1                           |
| 2                | Impact of antibiotic on grower                                                                            | antibiotic-species            | Cell Count in One-Species, One-Antibiotic Droplets | Cell Count in One-Species, No Antibiotic Droplets  | Yes                                          | 1                           |
| 3                | Impact of partner strain on antibiotic's effect on grower                                                 | species-antibiotic-species    | Cell Count in Two-Species, One-Antibiotic Droplets | Cell Count in One-Species, One-Antibiotic Droplets | No                                           | -1                          |
| 4                | Impact of secondary (less effective) antibiotic on primary (more effective) antibiotic's effect on grower | antibiotic-antibiotic-species | Cell Count in One-Species, Two-Antibiotic Droplets | Cell Count in One-Species, One-Antibiotic Droplets | Yes                                          | -1                          |



**Table S7. Interactions from Antibiotics Experiments 8-14 (30°C), Related to Figure 6**

| Interaction Type (Table S6) | Source | Sink       | Numerator                      | Denominator                      | Numerator Mean | Denominator Mean | n (Numerator) | n (Denominator) | Ratio | p       | p<0.05 | Included in Fig. 6b |
|-----------------------------|--------|------------|--------------------------------|----------------------------------|----------------|------------------|---------------|-----------------|-------|---------|--------|---------------------|
| 1                           | RFP    | YFP        | Number of YFP with RFP         | Number of YFP alone              | 23.7           | 30.4             | 120           | 47              | 0.78  | 2.7E-04 | TRUE   | FALSE               |
| 1                           | RFP    | CFP        | Number of CFP with RFP         | Number of CFP alone              | 3.7            | 4.0              | 265           | 124             | 0.93  | 2.0E-01 | FALSE  | FALSE               |
| 1                           | YFP    | RFP        | Number of RFP with YFP         | Number of RFP alone              | 7.5            | 8.3              | 120           | 112             | 0.91  | 1.4E-01 | FALSE  | FALSE               |
| 1                           | YFP    | CFP        | Number of CFP with YFP         | Number of CFP alone              | 8.0            | 4.0              | 172           | 124             | 2.01  | 9.6E-15 | TRUE   | TRUE                |
| 1                           | CFP    | RFP        | Number of RFP with CFP         | Number of RFP alone              | 7.3            | 8.3              | 265           | 112             | 0.88  | 3.0E-02 | TRUE   | FALSE               |
| 1                           | CFP    | YFP        | Number of YFP with CFP         | Number of YFP alone              | 20.1           | 30.4             | 172           | 47              | 0.66  | 4.1E-08 | TRUE   | TRUE                |
| 2                           | CRB    | RFP        | Number of RFP with CRB         | Number of RFP with no antibiotic | 9.3            | 8.3              | 256           | 112             | 1.12  | 6.4E-02 | FALSE  | FALSE               |
| 2                           | STR    | RFP        | Number of RFP with STR         | Number of RFP with no antibiotic | 8.7            | 8.3              | 188           | 112             | 1.04  | 5.1E-01 | FALSE  | FALSE               |
| 2                           | ERY    | RFP        | Number of RFP with ERY         | Number of RFP with no antibiotic | 5.6            | 8.3              | 145           | 112             | 0.68  | 4.7E-08 | TRUE   | TRUE                |
| 2                           | CRB    | YFP        | Number of YFP with CRB         | Number of YFP with no antibiotic | 2.3            | 30.4             | 33            | 47              | 0.07  | 4.7E-14 | TRUE   | TRUE                |
| 2                           | STR    | YFP        | Number of YFP with STR         | Number of YFP with no antibiotic | 27.4           | 30.4             | 114           | 47              | 0.90  | 1.1E-01 | FALSE  | FALSE               |
| 2                           | ERY    | YFP        | Number of YFP with ERY         | Number of YFP with no antibiotic | 19.1           | 30.4             | 91            | 47              | 0.63  | 2.4E-09 | TRUE   | TRUE                |
| 2                           | CRB    | CFP        | Number of CFP with CRB         | Number of CFP with no antibiotic | 2.8            | 4.0              | 174           | 124             | 0.71  | 1.3E-04 | TRUE   | FALSE               |
| 2                           | STR    | CFP        | Number of CFP with STR         | Number of CFP with no antibiotic | 1.1            | 4.0              | 23            | 124             | 0.27  | 3.3E-09 | TRUE   | TRUE                |
| 2                           | ERY    | CFP        | Number of CFP with ERY         | Number of CFP with no antibiotic | 1.9            | 4.0              | 66            | 124             | 0.48  | 3.3E-09 | TRUE   | TRUE                |
| 3                           | YFP    | CRB to RFP | Number of RFP with CRB and YFP | Number of RFP with CRB alone     | 8.1            | 9.3              | 21            | 256             | 0.88  | 6.0E-01 | FALSE  | FALSE               |
| 3                           | YFP    | STR to RFP | Number of RFP with STR and YFP | Number of RFP with STR alone     | 8.0            | 8.7              | 238           | 188             | 0.92  | 4.8E-02 | TRUE   | FALSE               |
| 3                           | YFP    | ERY to RFP | Number of RFP with ERY and YFP | Number of RFP with ERY alone     | 5.8            | 5.6              | 151           | 145             | 1.03  | 8.5E-01 | FALSE  | FALSE               |
| 3                           | CFP    | CRB to RFP | Number of RFP with CRB and CFP | Number of RFP with CRB alone     | 7.7            | 9.3              | 301           | 256             | 0.83  | 6.5E-04 | TRUE   | FALSE               |
| 3                           | CFP    | STR to RFP | Number of RFP with STR and CFP | Number of RFP with STR alone     | 10.4           | 8.7              | 73            | 188             | 1.20  | 3.4E-03 | TRUE   | FALSE               |
| 3                           | CFP    | ERY to RFP | Number of RFP with ERY and CFP | Number of RFP with ERY alone     | 5.3            | 5.6              | 92            | 145             | 0.94  | 5.4E-01 | FALSE  | FALSE               |
| 3                           | RFP    | CRB to YFP | Number of YFP with CRB and RFP | Number of YFP with CRB alone     | 2.2            | 2.3              | 21            | 33              | 0.98  | 9.9E-01 | FALSE  | FALSE               |
| 3                           | RFP    | STR to YFP | Number of YFP with STR and RFP | Number of YFP with STR alone     | 21.2           | 27.4             | 238           | 114             | 0.77  | 3.7E-10 | TRUE   | FALSE               |
| 3                           | RFP    | ERY to YFP | Number of YFP with ERY and RFP | Number of YFP with ERY alone     | 13.5           | 19.1             | 151           | 91              | 0.70  | 4.1E-06 | TRUE   | TRUE                |
| 3                           | CFP    | CRB to YFP | Number of YFP with CRB and CFP | Number of YFP with CRB alone     | 2.2            | 2.3              | 42            | 33              | 0.96  | 6.8E-01 | FALSE  | FALSE               |
| 3                           | CFP    | STR to YFP | Number of YFP with STR and CFP | Number of YFP with STR alone     | 25.1           | 27.4             | 42            | 114             | 0.92  | 8.3E-02 | FALSE  | FALSE               |
| 3                           | CFP    | ERY to YFP | Number of YFP with ERY and CFP | Number of YFP with ERY alone     | 15.5           | 19.1             | 150           | 91              | 0.81  | 2.3E-03 | TRUE   | FALSE               |
| 3                           | RFP    | CRB to CFP | Number of CFP with CRB and RFP | Number of CFP with CRB alone     | 2.5            | 2.8              | 301           | 174             | 0.88  | 9.1E-03 | TRUE   | FALSE               |
| 3                           | RFP    | STR to CFP | Number of CFP with STR and RFP | Number of CFP with STR alone     | 1.3            | 1.1              | 73            | 23              | 1.17  | 2.8E-01 | FALSE  | FALSE               |
| 3                           | RFP    | ERY to CFP | Number of CFP with ERY and RFP | Number of CFP with ERY alone     | 1.9            | 1.9              | 92            | 66              | 1.01  | 7.9E-01 | FALSE  | FALSE               |
| 3                           | YFP    | CRB to CFP | Number of CFP with CRB and YFP | Number of CFP with CRB alone     | 3.4            | 2.8              | 42            | 174             | 1.22  | 6.0E-02 | FALSE  | FALSE               |

|   |     |            |                                |                              |      |      |     |     |      |         |       |       |
|---|-----|------------|--------------------------------|------------------------------|------|------|-----|-----|------|---------|-------|-------|
| 3 | YFP | STR to CFP | Number of CFP with STR and YFP | Number of CFP with STR alone | 1.1  | 1.1  | 42  | 23  | 1.01 | 9.2E-01 | FALSE | FALSE |
| 3 | YFP | ERY to CFP | Number of CFP with ERY and YFP | Number of CFP with ERY alone | 3.2  | 1.9  | 150 | 66  | 1.66 | 6.7E-05 | TRUE  | TRUE  |
| 4 | STR | CRB to RFP | Number of RFP with CRB and STR | Number of RFP with CRB only  | 8.1  | 9.3  | 478 | 256 | 0.87 | 4.0E-03 | TRUE  | FALSE |
| 4 | CRB | ERY to RFP | Number of RFP with ERY and CRB | Number of RFP with ERY only  | 7.7  | 5.6  | 241 | 145 | 1.36 | 7.7E-07 | TRUE  | FALSE |
| 4 | STR | ERY to RFP | Number of RFP with ERY and STR | Number of RFP with ERY only  | 8.1  | 5.6  | 212 | 145 | 1.44 | 2.8E-11 | TRUE  | TRUE  |
| 4 | STR | CRB to YFP | Number of YFP with CRB and STR | Number of YFP with CRB only  | 1.9  | 2.3  | 52  | 33  | 0.83 | 4.1E-01 | FALSE | FALSE |
| 4 | ERY | CRB to YFP | Number of YFP with CRB and ERY | Number of YFP with CRB only  | 1.9  | 2.3  | 10  | 33  | 0.84 | 5.0E-01 | FALSE | FALSE |
| 4 | STR | ERY to YFP | Number of YFP with ERY and STR | Number of YFP with ERY only  | 18.1 | 19.1 | 135 | 91  | 0.94 | 2.1E-01 | FALSE | FALSE |
| 4 | CRB | STR to CFP | Number of CFP with STR and CRB | Number of CFP with STR only  | 1.1  | 1.1  | 36  | 23  | 1.02 | 1.0E+00 | FALSE | FALSE |
| 4 | CRB | ERY to CFP | Number of CFP with ERY and CRB | Number of CFP with ERY only  | 2.2  | 1.9  | 179 | 66  | 1.15 | 8.2E-02 | FALSE | FALSE |
| 4 | ERY | STR to CFP | Number of CFP with STR and ERY | Number of CFP with STR only  | 1.4  | 1.1  | 43  | 23  | 1.28 | 1.4E-01 | FALSE | FALSE |

**Table S8. Interactions from Antibiotics Experiments 15-21 (37°C), Related to Figure 6**

| Interaction Type (Table S6) | Source | Sink       | Numerator                      | Denominator                      | Numerator Mean | Denominator Mean | n (Numerator) | n (Denominator) | Ratio | p       | p<0.05 | Included in Fig. 6c |
|-----------------------------|--------|------------|--------------------------------|----------------------------------|----------------|------------------|---------------|-----------------|-------|---------|--------|---------------------|
| 1                           | RFP    | YFP        | Number of YFP with RFP         | Number of YFP alone              | 30.0           | 29.7             | 57            | 38              | 1.01  | 7.4E-01 | FALSE  | FALSE               |
| 1                           | RFP    | CFP        | Number of CFP with RFP         | Number of CFP alone              | 4.3            | 4.7              | 159           | 99              | 0.92  | 3.1E-01 | FALSE  | FALSE               |
| 1                           | YFP    | RFP        | Number of RFP with YFP         | Number of RFP alone              | 2.3            | 2.6              | 57            | 49              | 0.88  | 7.6E-01 | FALSE  | FALSE               |
| 1                           | YFP    | CFP        | Number of CFP with YFP         | Number of CFP alone              | 11.4           | 4.7              | 179           | 99              | 2.45  | 6.2E-15 | TRUE   | TRUE                |
| 1                           | CFP    | RFP        | Number of RFP with CFP         | Number of RFP alone              | 2.4            | 2.6              | 159           | 49              | 0.94  | 9.5E-01 | FALSE  | FALSE               |
| 1                           | CFP    | YFP        | Number of YFP with CFP         | Number of YFP alone              | 22.1           | 29.7             | 179           | 38              | 0.74  | 1.5E-04 | TRUE   | FALSE               |
| 2                           | CRB    | RFP        | Number of RFP with CRB         | Number of RFP with no antibiotic | 1.7            | 2.6              | 220           | 49              | 0.67  | 8.1E-04 | TRUE   | TRUE                |
| 2                           | STR    | RFP        | Number of RFP with STR         | Number of RFP with no antibiotic | 1.9            | 2.6              | 251           | 49              | 0.74  | 1.3E-02 | TRUE   | FALSE               |
| 2                           | ERY    | RFP        | Number of RFP with ERY         | Number of RFP with no antibiotic | 1.9            | 2.6              | 70            | 49              | 0.73  | 3.1E-02 | TRUE   | FALSE               |
| 2                           | CRB    | YFP        | Number of YFP with CRB         | Number of YFP with no antibiotic | 5.2            | 29.7             | 110           | 38              | 0.18  | 2.7E-11 | TRUE   | TRUE                |
| 2                           | STR    | YFP        | Number of YFP with STR         | Number of YFP with no antibiotic | 29.8           | 29.7             | 150           | 38              | 1.01  | 2.0E-01 | FALSE  | FALSE               |
| 2                           | ERY    | YFP        | Number of YFP with ERY         | Number of YFP with no antibiotic | 17.8           | 29.7             | 76            | 38              | 0.60  | 5.3E-07 | TRUE   | TRUE                |
| 2                           | CRB    | CFP        | Number of CFP with CRB         | Number of CFP with no antibiotic | 2.6            | 4.7              | 127           | 99              | 0.56  | 5.5E-10 | TRUE   | TRUE                |
| 2                           | STR    | CFP        | Number of CFP with STR         | Number of CFP with no antibiotic | 1.1            | 4.7              | 22            | 99              | 0.23  | 3.5E-10 | TRUE   | TRUE                |
| 2                           | ERY    | CFP        | Number of CFP with ERY         | Number of CFP with no antibiotic | 3.3            | 4.7              | 127           | 99              | 0.70  | 1.1E-05 | TRUE   | TRUE                |
| 3                           | YFP    | CRB to RFP | Number of RFP with CRB and YFP | Number of RFP with CRB alone     | 2.0            | 1.7              | 95            | 220             | 1.16  | 9.9E-02 | FALSE  | FALSE               |
| 3                           | YFP    | STR to RFP | Number of RFP with STR and YFP | Number of RFP with STR alone     | 2.0            | 1.9              | 234           | 251             | 1.03  | 8.7E-01 | FALSE  | FALSE               |
| 3                           | YFP    | ERY to RFP | Number of RFP with ERY and YFP | Number of RFP with ERY alone     | 1.8            | 1.9              | 81            | 70              | 0.93  | 6.2E-01 | FALSE  | FALSE               |
| 3                           | CFP    | CRB to RFP | Number of RFP with CRB and CFP | Number of RFP with CRB alone     | 1.8            | 1.7              | 138           | 220             | 1.06  | 9.4E-02 | FALSE  | FALSE               |
| 3                           | CFP    | STR to RFP | Number of RFP with STR and CFP | Number of RFP with STR alone     | 2.0            | 1.9              | 43            | 251             | 1.07  | 5.5E-01 | FALSE  | FALSE               |
| 3                           | CFP    | ERY to RFP | Number of RFP with ERY and CFP | Number of RFP with ERY alone     | 1.9            | 1.9              | 125           | 70              | 0.98  | 8.2E-01 | FALSE  | FALSE               |
| 3                           | RFP    | CRB to YFP | Number of YFP with CRB and RFP | Number of YFP with CRB alone     | 5.0            | 5.2              | 95            | 110             | 0.96  | 5.3E-01 | FALSE  | FALSE               |
| 3                           | RFP    | STR to YFP | Number of YFP with STR and RFP | Number of YFP with STR alone     | 28.2           | 29.8             | 234           | 150             | 0.95  | 4.6E-02 | TRUE   | FALSE               |
| 3                           | RFP    | ERY to YFP | Number of YFP with ERY and RFP | Number of YFP with ERY alone     | 18.1           | 17.8             | 81            | 76              | 1.02  | 6.3E-01 | FALSE  | FALSE               |

|   |     |            |                                |                              |      |      |     |     |      |         |       |       |
|---|-----|------------|--------------------------------|------------------------------|------|------|-----|-----|------|---------|-------|-------|
| 3 | CFP | CRB to YFP | Number of YFP with CRB and CFP | Number of YFP with CRB alone | 5.4  | 5.2  | 47  | 110 | 1.05 | 5.7E-01 | FALSE | FALSE |
| 3 | CFP | STR to YFP | Number of YFP with STR and CFP | Number of YFP with STR alone | 28.5 | 29.8 | 41  | 150 | 0.96 | 4.9E-01 | FALSE | FALSE |
| 3 | CFP | ERY to YFP | Number of YFP with ERY and CFP | Number of YFP with ERY alone | 9.8  | 17.8 | 220 | 76  | 0.55 | 4.8E-13 | TRUE  | TRUE  |
| 3 | RFP | CRB to CFP | Number of CFP with CRB and RFP | Number of CFP with CRB alone | 2.8  | 2.6  | 138 | 127 | 1.08 | 3.8E-01 | FALSE | FALSE |
| 3 | RFP | STR to CFP | Number of CFP with STR and RFP | Number of CFP with STR alone | 1.1  | 1.1  | 43  | 22  | 1.04 | 7.5E-01 | FALSE | FALSE |
| 3 | RFP | ERY to CFP | Number of CFP with ERY and RFP | Number of CFP with ERY alone | 3.5  | 3.3  | 125 | 127 | 1.07 | 4.3E-01 | FALSE | FALSE |
| 3 | YFP | CRB to CFP | Number of CFP with CRB and YFP | Number of CFP with CRB alone | 2.6  | 2.6  | 47  | 127 | 1.01 | 9.5E-01 | FALSE | FALSE |
| 3 | YFP | STR to CFP | Number of CFP with STR and YFP | Number of CFP with STR alone | 1.3  | 1.1  | 41  | 22  | 1.18 | 1.4E-01 | FALSE | FALSE |
| 3 | YFP | ERY to CFP | Number of CFP with ERY and YFP | Number of CFP with ERY alone | 8.5  | 3.3  | 220 | 127 | 2.61 | 1.6E-20 | TRUE  | TRUE  |
| 4 | STR | CRB to RFP | Number of RFP with CRB and STR | Number of RFP with CRB only  | 1.5  | 1.7  | 204 | 220 | 0.87 | 3.7E-02 | TRUE  | FALSE |
| 4 | ERY | CRB to RFP | Number of RFP with CRB and ERY | Number of RFP with CRB only  | 1.5  | 1.7  | 216 | 220 | 0.87 | 5.0E-02 | FALSE | FALSE |
| 4 | STR | ERY to RFP | Number of RFP with ERY and STR | Number of RFP with ERY only  | 1.5  | 1.9  | 130 | 70  | 0.77 | 1.5E-02 | TRUE  | FALSE |
| 4 | STR | CRB to YFP | Number of YFP with CRB and STR | Number of YFP with CRB only  | 3.5  | 5.2  | 181 | 110 | 0.68 | 6.7E-08 | TRUE  | TRUE  |
| 4 | ERY | CRB to YFP | Number of YFP with CRB and ERY | Number of YFP with CRB only  | 5.3  | 5.2  | 68  | 110 | 1.02 | 8.9E-01 | FALSE | FALSE |
| 4 | STR | ERY to YFP | Number of YFP with ERY and STR | Number of YFP with ERY only  | 15.6 | 17.8 | 230 | 76  | 0.88 | 1.5E-01 | FALSE | FALSE |
| 4 | CRB | STR to CFP | Number of CFP with STR and CRB | Number of CFP with STR only  | 1.2  | 1.1  | 107 | 22  | 1.10 | 3.1E-01 | FALSE | FALSE |
| 4 | ERY | CRB to CFP | Number of CFP with CRB and ERY | Number of CFP with CRB only  | 2.7  | 2.6  | 144 | 127 | 1.04 | 7.5E-01 | FALSE | FALSE |
| 4 | ERY | STR to CFP | Number of CFP with STR and ERY | Number of CFP with STR only  | 1.2  | 1.1  | 17  | 22  | 1.08 | 7.7E-01 | FALSE | FALSE |

**Table S9. Strains Used in this Work, Related to STAR Methods**

| Species                  | Strain                                                                                  | Fluorescent Reporter | Abbreviation                   | Reference                                      |
|--------------------------|-----------------------------------------------------------------------------------------|----------------------|--------------------------------|------------------------------------------------|
| <i>B. subtilis</i>       | <i>B. subtilis</i> 168, trpC2, cat                                                      | None                 | -                              | (Burkholder and Giles, 1947)                   |
| <i>B. subtilis</i>       | <i>B. subtilis</i> 168, trpC2, cat, amyE::Pveg-gfp-spec                                 | GFP                  | BS Trp-                        | This work                                      |
| <i>E. coli</i>           | <i>E. coli</i> BW27783                                                                  | None                 | -                              | (Khlebnikov et al., 2001)                      |
| <i>E. coli</i>           | <i>E. coli</i> MG1655z1                                                                 | None                 | -                              | (Cox et al., 2007)                             |
| <i>E. coli</i>           | <i>E. coli</i> BW25113 pheA::Kan                                                        | None                 | -                              | (Baba et al., 2006)                            |
| <i>E. coli</i>           | <i>E. coli</i> BW25113, metA::Kan                                                       | None                 | -                              | (Baba et al., 2006)                            |
| <i>E. coli</i>           | <i>E. coli</i> K12 BW25113, ΔmetB, att::pLC280 [kan P_L'-cfp oriR6K]                    | CFP                  | EC Met- (CFP)                  | (Adamowicz et al., 2018)                       |
| <i>E. coli</i>           | <i>E. coli</i> BW25113, pheA::Kan, pOSV006                                              | RFP                  | EC Met- Lac* and EC Met- (RFP) | This work                                      |
| <i>E. coli</i>           | <i>E. coli</i> BW25113, metA::Kan, pOSV006                                              | RFP                  | EC WT                          | This work                                      |
| <i>E. coli</i>           | <i>E. coli</i> BW27783, pOSV022                                                         | GFP                  | Sender                         | This work                                      |
| <i>E. coli</i>           | <i>E. coli</i> MG1655z1, pOSV151                                                        | RFP                  | Receiver                       | This work                                      |
| <i>M. extorquens</i> AM1 | <i>M. extorquens</i> AM1, ΔhprA::kan                                                    | RFP                  | ME                             | (Adamowicz et al., 2018)                       |
| <i>S. typhimurium</i>    | <i>S. typhimurium</i> LT2, metA(P35L), metJ(16:IS10), att::pLC246 [kan P_L'-yfp oriR6K] | YFP                  | ST Lac*                        | (Adamowicz et al., 2018; Douglas et al., 2016) |

**Table S10. Plasmids Used to Generate Strains in Table S9, Related to STAR Methods**

| <b>Plasmid</b> | <b>Description</b>                               | <b>Reference</b>                                              |
|----------------|--------------------------------------------------|---------------------------------------------------------------|
| pOSV006        | mCherry expression vector                        | This work                                                     |
| pOSV022        | Quorum sensing production vector (sender)        | This work                                                     |
| pOSV151        | Quorum sensing regulated toxin vector (receiver) | This work                                                     |
| pVP038         | amyE::Pveg-gfp-spec transformation vector        | (Radzinski, N. P., Wang, M., and Burton, B. M., Unpublished.) |



**Table S11. Interaction Magnitudes and Statistics for Experiments 8-21, Related to Figures 6 and S10**

| Temperature | Antibiotics | Time | Strain (Sink Node) | Grown With (Source Node) | p-value     | <0.05 | Mean Count Alone | Mean Count With Partner | Fold Change | Fold Change LCI | Fold Change UCI | Interaction Strength | Interaction Strength LCI | Interaction Strength UCI | Number of Droplets |
|-------------|-------------|------|--------------------|--------------------------|-------------|-------|------------------|-------------------------|-------------|-----------------|-----------------|----------------------|--------------------------|--------------------------|--------------------|
| 30C         | CRB         | 36hr | EC Met-            | ME                       | 0.009050247 | TRUE  | 2.81             | 2.47                    | 0.88        | 0.78            | 0.99            | -0.19                | -0.36                    | -0.02                    | 475                |
| 30C         | CRB         | 36hr | EC Met-            | ST Lac*                  | 0.059942167 | FALSE | 2.81             | 3.43                    | 1.22        | 1               | 1.47            | 0.29                 | 0                        | 0.56                     | 216                |
| 30C         | CRB         | 36hr | ME                 | EC Met-                  | 0.000649828 | TRUE  | 9.25             | 7.72                    | 0.83        | 0.76            | 0.92            | -0.26                | -0.39                    | -0.13                    | 557                |
| 30C         | CRB         | 36hr | ME                 | ST Lac*                  | 0.604954812 | FALSE | 9.25             | 8.14                    | 0.88        | 0.6             | 1.15            | -0.18                | -0.73                    | 0.2                      | 277                |
| 30C         | CRB         | 36hr | ST Lac*            | EC Met-                  | 0.683073499 | FALSE | 2.27             | 2.19                    | 0.96        | 0.53            | 1.71            | -0.05                | -0.91                    | 0.78                     | 75                 |
| 30C         | CRB         | 36hr | ST Lac*            | ME                       | 0.99207931  | FALSE | 2.27             | 2.24                    | 0.98        | 0.48            | 1.94            | -0.02                | -1.04                    | 0.96                     | 54                 |
| 30C         | CRBxERY     | 36hr | EC Met-            | ME                       | 0.478250977 | FALSE | 2.2              | 2.35                    | 1.07        | 0.96            | 1.19            | 0.1                  | -0.06                    | 0.25                     | 517                |
| 30C         | CRBxERY     | 36hr | EC Met-            | ST Lac*                  | 5.51E-06    | TRUE  | 2.2              | 4.31                    | 1.96        | 1.51            | 2.51            | 0.97                 | 0.59                     | 1.33                     | 208                |
| 30C         | CRBxERY     | 36hr | ME                 | EC Met-                  | 4.52E-07    | TRUE  | 7.68             | 6.04                    | 0.79        | 0.72            | 0.86            | -0.35                | -0.47                    | -0.22                    | 579                |
| 30C         | CRBxERY     | 36hr | ME                 | ST Lac*                  | 0.897016135 | FALSE | 7.68             | 7.61                    | 0.99        | 0.75            | 1.24            | -0.01                | -0.41                    | 0.31                     | 259                |
| 30C         | CRBxERY     | 36hr | ST Lac*            | EC Met-                  | 0.931901508 | FALSE | 1.9              | 2.1                     | 1.11        | 0.75            | 1.64            | 0.15                 | -0.41                    | 0.72                     | 39                 |
| 30C         | CRBxERY     | 36hr | ST Lac*            | ME                       | 0.00171774  | TRUE  | 1.9              | 1.06                    | 0.56        | 0.42            | 0.79            | -0.85                | -1.26                    | -0.33                    | 28                 |
| 30C         | CRBxSTR     | 36hr | EC Met-            | ME                       | 0.102836497 | FALSE | 1.11             | 1.02                    | 0.91        | 0.8             | 1.02            | -0.13                | -0.32                    | 0.02                     | 99                 |
| 30C         | CRBxSTR     | 36hr | EC Met-            | ST Lac*                  | 0.493776269 | FALSE | 1.11             | 1                       | 0.9         | 0.8             | 1               | -0.15                | -0.32                    | 0                        | 42                 |
| 30C         | CRBxSTR     | 36hr | ME                 | EC Met-                  | 0.152563475 | FALSE | 8.08             | 9.21                    | 1.14        | 0.98            | 1.31            | 0.19                 | -0.02                    | 0.39                     | 541                |
| 30C         | CRBxSTR     | 36hr | ME                 | ST Lac*                  | 0.156116394 | FALSE | 8.08             | 9.18                    | 1.14        | 0.97            | 1.31            | 0.18                 | -0.04                    | 0.39                     | 540                |
| 30C         | CRBxSTR     | 36hr | ST Lac*            | EC Met-                  | 0.096977868 | FALSE | 1.88             | 2.83                    | 1.5         | 0.72            | 2.58            | 0.59                 | -0.48                    | 1.37                     | 58                 |
| 30C         | CRBxSTR     | 36hr | ST Lac*            | ME                       | 0.950352974 | FALSE | 1.88             | 1.63                    | 0.86        | 0.63            | 1.2             | -0.21                | -0.67                    | 0.26                     | 114                |
| 30C         | ERY         | 36hr | EC Met-            | ME                       | 0.786536325 | FALSE | 1.91             | 1.92                    | 1.01        | 0.83            | 1.22            | 0.01                 | -0.27                    | 0.29                     | 158                |
| 30C         | ERY         | 36hr | EC Met-            | ST Lac*                  | 6.69E-05    | TRUE  | 1.91             | 3.16                    | 1.66        | 1.39            | 1.98            | 0.73                 | 0.48                     | 0.99                     | 216                |
| 30C         | ERY         | 36hr | ME                 | EC Met-                  | 0.538353407 | FALSE | 5.64             | 5.33                    | 0.94        | 0.81            | 1.1             | -0.08                | -0.31                    | 0.14                     | 237                |
| 30C         | ERY         | 36hr | ME                 | ST Lac*                  | 0.849079234 | FALSE | 5.64             | 5.79                    | 1.03        | 0.89            | 1.18            | 0.04                 | -0.16                    | 0.24                     | 296                |
| 30C         | ERY         | 36hr | ST Lac*            | EC Met-                  | 0.002282559 | TRUE  | 19.14            | 15.45                   | 0.81        | 0.7             | 0.93            | -0.31                | -0.51                    | -0.11                    | 241                |
| 30C         | ERY         | 36hr | ST Lac*            | ME                       | 4.09E-06    | TRUE  | 19.14            | 13.48                   | 0.7         | 0.61            | 0.81            | -0.51                | -0.71                    | -0.31                    | 242                |
| 30C         | ERYxSTR     | 36hr | EC Met-            | ME                       | 0.804396337 | FALSE | 1.4              | 1.28                    | 0.92        | 0.72            | 1.16            | -0.12                | -0.47                    | 0.22                     | 131                |
| 30C         | ERYxSTR     | 36hr | EC Met-            | ST Lac*                  | 0.463863896 | FALSE | 1.4              | 1.51                    | 1.08        | 0.82            | 1.43            | 0.11                 | -0.29                    | 0.52                     | 108                |
| 30C         | ERYxSTR     | 36hr | ME                 | EC Met-                  | 0.952501961 | FALSE | 8.14             | 8.1                     | 1           | 0.89            | 1.1             | -0.01                | -0.16                    | 0.14                     | 300                |
| 30C         | ERYxSTR     | 36hr | ME                 | ST Lac*                  | 8.75E-08    | TRUE  | 8.14             | 6.7                     | 0.82        | 0.76            | 0.9             | -0.28                | -0.4                     | -0.16                    | 486                |
| 30C         | ERYxSTR     | 36hr | ST Lac*            | EC Met-                  | 0.043210584 | TRUE  | 18.09            | 16.14                   | 0.89        | 0.79            | 1               | -0.16                | -0.33                    | 0                        | 200                |
| 30C         | ERYxSTR     | 36hr | ST Lac*            | ME                       | 2.96E-12    | TRUE  | 18.09            | 13.25                   | 0.73        | 0.67            | 0.79            | -0.45                | -0.57                    | -0.33                    | 409                |
| 30C         | NONE        | 36hr | EC Met-            | ME                       | 0.200875517 | FALSE | 3.97             | 3.69                    | 0.93        | 0.81            | 1.08            | -0.1                 | -0.31                    | 0.11                     | 389                |
| 30C         | NONE        | 36hr | EC Met-            | ST Lac*                  | 9.60E-15    | TRUE  | 3.97             | 7.97                    | 2.01        | 1.74            | 2.33            | 1.01                 | 0.8                      | 1.22                     | 296                |
| 30C         | NONE        | 36hr | ME                 | EC Met-                  | 0.030184249 | TRUE  | 8.29             | 7.3                     | 0.88        | 0.8             | 0.98            | -0.18                | -0.33                    | -0.03                    | 377                |
| 30C         | NONE        | 36hr | ME                 | ST Lac*                  | 0.136328763 | FALSE | 8.29             | 7.52                    | 0.91        | 0.8             | 1.03            | -0.14                | -0.32                    | 0.04                     | 232                |
| 30C         | NONE        | 36hr | ST Lac*            | EC Met-                  | 4.12E-08    | TRUE  | 30.45            | 20.13                   | 0.66        | 0.59            | 0.74            | -0.6                 | -0.76                    | -0.44                    | 219                |
| 30C         | NONE        | 36hr | ST Lac*            | ME                       | 0.000266852 | TRUE  | 30.45            | 23.73                   | 0.78        | 0.7             | 0.87            | -0.36                | -0.52                    | -0.21                    | 167                |
| 30C         | STR         | 36hr | EC Met-            | ME                       | 0.282065416 | FALSE | 1.09             | 1.27                    | 1.17        | 0.98            | 1.39            | 0.23                 | -0.02                    | 0.47                     | 96                 |
| 30C         | STR         | 36hr | EC Met-            | ST Lac*                  | 0.923708788 | FALSE | 1.09             | 1.1                     | 1.01        | 0.88            | 1.14            | 0.01                 | -0.18                    | 0.19                     | 65                 |
| 30C         | STR         | 36hr | ME                 | EC Met-                  | 0.003395288 | TRUE  | 8.65             | 10.4                    | 1.2         | 1.05            | 1.36            | 0.26                 | 0.07                     | 0.45                     | 261                |
| 30C         | STR         | 36hr | ME                 | ST Lac*                  | 0.048202448 | TRUE  | 8.65             | 7.96                    | 0.92        | 0.83            | 1.02            | -0.12                | -0.27                    | 0.03                     | 426                |
| 30C         | STR         | 36hr | ST Lac*            | EC Met-                  | 0.083226748 | FALSE | 27.38            | 25.12                   | 0.92        | 0.8             | 1.04            | -0.12                | -0.32                    | 0.05                     | 156                |
| 30C         | STR         | 36hr | ST Lac*            | ME                       | 3.71E-10    | TRUE  | 27.38            | 21.19                   | 0.77        | 0.71            | 0.84            | -0.37                | -0.49                    | -0.24                    | 352                |
| 37C         | CRB         | 18hr | EC Met-            | ME                       | 0.378819723 | FALSE | 2.6              | 2.8                     | 1.08        | 0.91            | 1.27            | 0.11                 | -0.14                    | 0.35                     | 265                |
| 37C         | CRB         | 18hr | EC Met-            | ST Lac*                  | 0.945587449 | FALSE | 2.6              | 2.62                    | 1.01        | 0.8             | 1.26            | 0.01                 | -0.32                    | 0.33                     | 174                |
| 37C         | CRB         | 18hr | ME                 | EC Met-                  | 0.094372932 | FALSE | 1.74             | 1.85                    | 1.06        | 0.94            | 1.2             | 0.09                 | -0.09                    | 0.27                     | 358                |
| 37C         | CRB         | 18hr | ME                 | ST Lac*                  | 0.09883517  | FALSE | 1.74             | 2.02                    | 1.16        | 0.99            | 1.36            | 0.22                 | -0.02                    | 0.45                     | 315                |
| 37C         | CRB         | 18hr | ST Lac*            | EC Met-                  | 0.572060235 | FALSE | 5.21             | 5.45                    | 1.05        | 0.86            | 1.26            | 0.06                 | -0.22                    | 0.33                     | 157                |
| 37C         | CRB         | 18hr | ST Lac*            | ME                       | 0.527350351 | FALSE | 5.21             | 4.98                    | 0.96        | 0.81            | 1.12            | -0.07                | -0.3                     | 0.16                     | 205                |
| 37C         | ERY         | 18hr | EC Met-            | ME                       | 0.427710743 | FALSE | 3.27             | 3.49                    | 1.07        | 0.87            | 1.31            | 0.09                 | -0.2                     | 0.38                     | 252                |

|     |         |      |         |         |             |       |       |       |      |      |      |       |       |       |     |
|-----|---------|------|---------|---------|-------------|-------|-------|-------|------|------|------|-------|-------|-------|-----|
| 37C | ERY     | 18hr | EC Met- | ST Lac* | 1.63E-20    | TRUE  | 3.27  | 8.54  | 2.61 | 2.23 | 3.09 | 1.39  | 1.16  | 1.63  | 347 |
| 37C | ERY     | 18hr | ME      | EC Met- | 0.818175148 | FALSE | 1.9   | 1.86  | 0.98 | 0.82 | 1.17 | -0.03 | -0.29 | 0.23  | 195 |
| 37C | ERY     | 18hr | ME      | ST Lac* | 0.620316363 | FALSE | 1.9   | 1.77  | 0.93 | 0.76 | 1.14 | -0.11 | -0.4  | 0.18  | 151 |
| 37C | ERY     | 18hr | ST Lac* | EC Met- | 4.80E-13    | TRUE  | 17.8  | 9.83  | 0.55 | 0.48 | 0.64 | -0.86 | -1.05 | -0.66 | 296 |
| 37C | ERY     | 18hr | ST Lac* | ME      | 0.632419672 | FALSE | 17.8  | 18.09 | 1.02 | 0.9  | 1.16 | 0.02  | -0.16 | 0.22  | 157 |
| 37C | ERYxCRB | 18hr | EC Met- | ME      | 0.641068381 | FALSE | 2.7   | 2.87  | 1.06 | 0.9  | 1.26 | 0.09  | -0.16 | 0.33  | 281 |
| 37C | ERYxCRB | 18hr | EC Met- | ST Lac* | 0.003466896 | TRUE  | 2.7   | 4.1   | 1.52 | 1.21 | 1.88 | 0.6   | 0.27  | 0.91  | 203 |
| 37C | ERYxCRB | 18hr | ME      | EC Met- | 0.972932977 | FALSE | 1.51  | 1.59  | 1.05 | 0.93 | 1.19 | 0.07  | -0.1  | 0.25  | 353 |
| 37C | ERYxCRB | 18hr | ME      | ST Lac* | 0.585487891 | FALSE | 1.51  | 1.64  | 1.08 | 0.94 | 1.24 | 0.11  | -0.08 | 0.31  | 318 |
| 37C | ERYxCRB | 18hr | ST Lac* | EC Met- | 0.185841771 | FALSE | 5.34  | 4.29  | 0.8  | 0.64 | 1.01 | -0.32 | -0.64 | 0.02  | 127 |
| 37C | ERYxCRB | 18hr | ST Lac* | ME      | 0.910746634 | FALSE | 5.34  | 5.26  | 0.99 | 0.81 | 1.22 | -0.02 | -0.3  | 0.29  | 170 |
| 37C | ERYxSTR | 18hr | EC Met- | ME      | 0.627371052 | FALSE | 1.18  | 1.07  | 0.91 | 0.71 | 1.13 | -0.14 | -0.5  | 0.18  | 32  |
| 37C | ERYxSTR | 18hr | EC Met- | ST Lac* | 0.741988596 | FALSE | 1.18  | 1.09  | 0.93 | 0.74 | 1.13 | -0.1  | -0.43 | 0.18  | 70  |
| 37C | ERYxSTR | 18hr | ME      | EC Met- | 0.299075248 | FALSE | 1.47  | 1.67  | 1.13 | 0.86 | 1.44 | 0.18  | -0.21 | 0.53  | 145 |
| 37C | ERYxSTR | 18hr | ME      | ST Lac* | 0.183957134 | FALSE | 1.47  | 1.67  | 1.14 | 1.01 | 1.27 | 0.19  | 0.02  | 0.35  | 421 |
| 37C | ERYxSTR | 18hr | ST Lac* | EC Met- | 0.913148686 | FALSE | 15.61 | 15.58 | 1    | 0.86 | 1.14 | 0     | -0.22 | 0.19  | 283 |
| 37C | ERYxSTR | 18hr | ST Lac* | ME      | 0.678671532 | FALSE | 15.61 | 15.29 | 0.98 | 0.89 | 1.07 | -0.03 | -0.16 | 0.1   | 521 |
| 37C | NONE    | 18hr | EC Met- | ME      | 0.308918711 | FALSE | 4.68  | 4.31  | 0.92 | 0.8  | 1.06 | -0.12 | -0.32 | 0.09  | 258 |
| 37C | NONE    | 18hr | EC Met- | ST Lac* | 6.16E-15    | TRUE  | 4.68  | 11.44 | 2.45 | 2.12 | 2.83 | 1.29  | 1.08  | 1.5   | 278 |
| 37C | NONE    | 18hr | ME      | EC Met- | 0.949676376 | FALSE | 2.59  | 2.44  | 0.94 | 0.77 | 1.17 | -0.09 | -0.38 | 0.23  | 208 |
| 37C | NONE    | 18hr | ME      | ST Lac* | 0.760149583 | FALSE | 2.59  | 2.28  | 0.88 | 0.7  | 1.11 | -0.18 | -0.51 | 0.15  | 106 |
| 37C | NONE    | 18hr | ST Lac* | EC Met- | 0.000154565 | TRUE  | 29.66 | 22.08 | 0.74 | 0.63 | 0.89 | -0.43 | -0.66 | -0.16 | 217 |
| 37C | NONE    | 18hr | ST Lac* | ME      | 0.740792136 | FALSE | 29.66 | 30.02 | 1.01 | 0.84 | 1.23 | 0.02  | -0.24 | 0.3   | 95  |
| 37C | STR2    | 18hr | EC Met- | ME      | 0.747104099 | FALSE | 1.09  | 1.14  | 1.04 | 0.9  | 1.21 | 0.06  | -0.16 | 0.27  | 65  |
| 37C | STR2    | 18hr | EC Met- | ST Lac* | 0.136312455 | FALSE | 1.09  | 1.29  | 1.18 | 0.99 | 1.4  | 0.24  | -0.01 | 0.49  | 63  |
| 37C | STR2    | 18hr | ME      | EC Met- | 0.548856184 | FALSE | 1.91  | 2.05  | 1.07 | 0.87 | 1.31 | 0.1   | -0.21 | 0.39  | 294 |
| 37C | STR2    | 18hr | ME      | ST Lac* | 0.869785752 | FALSE | 1.91  | 1.97  | 1.03 | 0.92 | 1.15 | 0.04  | -0.12 | 0.21  | 485 |
| 37C | STR2    | 18hr | ST Lac* | EC Met- | 0.494558739 | FALSE | 29.82 | 28.51 | 0.96 | 0.85 | 1.06 | -0.06 | -0.24 | 0.08  | 191 |
| 37C | STR2    | 18hr | ST Lac* | ME      | 0.045619766 | TRUE  | 29.82 | 28.23 | 0.95 | 0.89 | 1.01 | -0.08 | -0.17 | 0.01  | 384 |
| 37C | STRxCRB | 18hr | EC Met- | ME      | 0.442430656 | FALSE | 1.2   | 1.24  | 1.04 | 0.93 | 1.16 | 0.05  | -0.11 | 0.22  | 173 |
| 37C | STRxCRB | 18hr | EC Met- | ST Lac* | 0.663219573 | FALSE | 1.2   | 1.28  | 1.07 | 0.93 | 1.23 | 0.1   | -0.11 | 0.3   | 168 |
| 37C | STRxCRB | 18hr | ME      | EC Met- | 0.656653487 | FALSE | 1.51  | 1.53  | 1.01 | 0.88 | 1.16 | 0.01  | -0.19 | 0.22  | 270 |
| 37C | STRxCRB | 18hr | ME      | ST Lac* | 0.190977433 | FALSE | 1.51  | 1.69  | 1.12 | 0.99 | 1.27 | 0.16  | -0.02 | 0.34  | 338 |
| 37C | STRxCRB | 18hr | ST Lac* | EC Met- | 0.414125805 | FALSE | 3.55  | 2.98  | 0.84 | 0.67 | 1.05 | -0.25 | -0.59 | 0.06  | 242 |
| 37C | STRxCRB | 18hr | ST Lac* | ME      | 0.026109391 | TRUE  | 3.55  | 2.73  | 0.77 | 0.63 | 0.93 | -0.38 | -0.67 | -0.11 | 315 |
